# Supplementary material for: Direct amide formation using radiofrequency heating
Source: Royal Society of Chemistry journal article supplement (doi:10.1039/c2ob26930a), 2012-11-08
Supplement: c2ob26930a.pdf [file c2ob26930a.pdf]

*Supplementary information*

**Direct amide bond formation using radiofrequency heating**

Thomas K. Houlding, Kirill Tchabanenko, Md. Taifur Rahman and Evgeny V. Rebrov

*Department of Chemistry & Chemical Engineering, Queen's University Belfast, UK*

**RF coil properties**

**Nickel ferrite recycling efficiency**

**$^1\text{H}$  and  $^{13}\text{C}$  NMR spectra of products**

## RF coil properties

Table S1. RF field properties for 4 and 5-turn coils

|                            | 5-turn coil | 4-turn coil |
|----------------------------|-------------|-------------|
| Frequency, kHz             | 287         | 312         |
| Theoretical field@200A, mT | 18.4        | 19.4        |
| Theoretical field@250A, mT | 23.0        | 24.3        |

## Nickel ferrite recycling efficiency

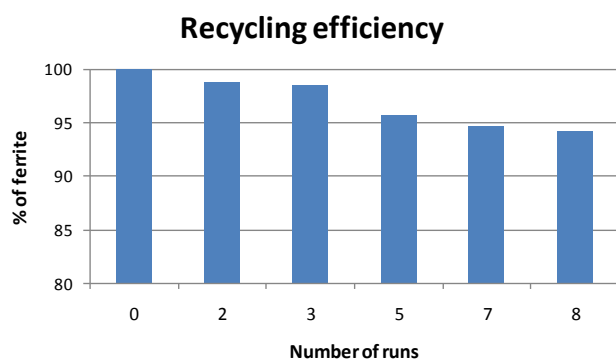

Figure S2 Efficiency of ferrite recycling by magnetic separation shown as a percentage of the initial amount of ferrite

# <sup>1</sup>H and <sup>13</sup>C NMR spectra of products

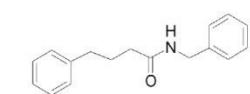

Amide 1, <sup>1</sup>H, 400MHz, CDCl<sub>3</sub>

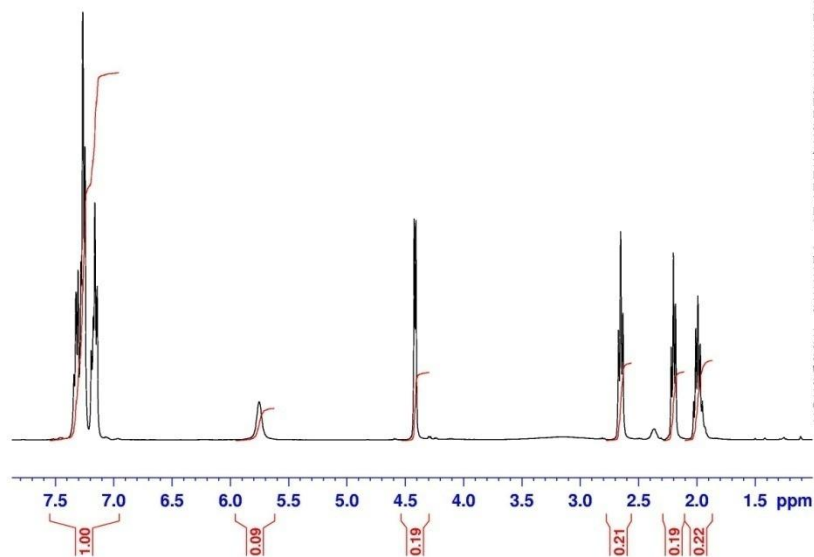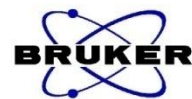

Current Data Parameters  
NAME Jul25-2012-tchabenko  
EXPNO 30  
PROCNO 1

F2 - Acquisition Parameters  
Date\_ 20120725  
Time 18.11  
INSTRUM AVIIL400  
PROBHD 5 mm PABBO BB-  
PULPROG zg30  
TD 65536  
SOLVENT CDCl3  
NS 16  
DS 2  
SWH 8223.685 Hz  
FIDRES 0.125483 Hz  
AQ 3.9846387 sec  
RG 80.6  
DW 60.800 usec  
DE 16.66 usec  
TE 299.0 K  
D1 1.0000000 sec  
TDO 1

----- CHANNEL f1 -----  
NUC1 1H  
P1 11.00 usec  
PL1 6.00 dB  
PL1W 32.2000076 W  
SFO1 400.1124708 MHz

F2 - Processing parameters  
SI 32765  
SF 400.1100153 MHz  
WDW EM  
SSB 0  
LB 0.30 Hz  
GB 0  
PC 1.00

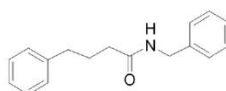

Amide 1, <sup>13</sup>C, 135MHz, CDCl<sub>3</sub>

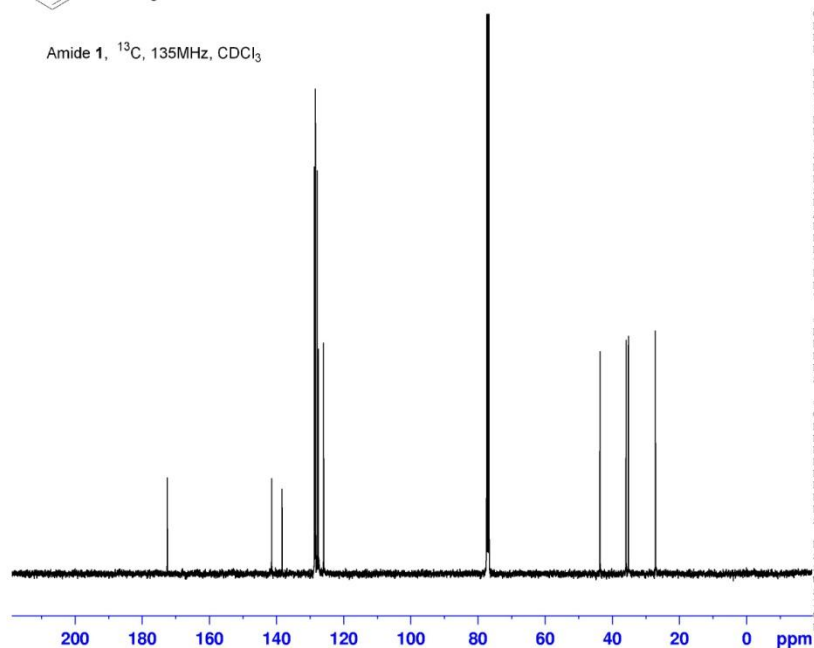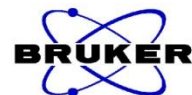

Current Data Parameters  
NAME Jul25-2012-tchabenko  
EXPNO 31  
PROCNO 1

F2 - Acquisition Parameters  
Date\_ 20120725  
Time 19.05  
INSTRUM AVIIL400  
PROBHD 5 mm PABBO BB-  
PULPROG zgpg30  
TD 96150  
SOLVENT CDCl3  
NS 1024  
DS 4  
SWH 24038.461 Hz  
FIDRES 0.250010 Hz  
AQ 1.9999700 sec  
RG 1150  
DW 20.800 usec  
DE 6.50 usec  
TE 300.3 K  
D1 1.0000000 sec  
D11 0.0300000 sec  
TDO 1

----- CHANNEL f1 -----  
NUC1 13C  
P1 9.00 usec  
PL1 -4.30 dB  
PL1W 96.67987061 W  
SFO1 100.6178003 MHz

----- CHANNEL f2 -----  
CPDPRG2 waltz64  
NUC2 1H  
PCPD2 60.00 usec  
PL2 -6.00 dB  
PL12 8.74 dB  
PL13 13.29 dB  
PL2W 32.20000076 W  
PL12W 1.08107519 W  
PL13W 0.37918913 W  
SFO2 400.1116004 MHz

F2 - Processing parameters  
SI 131072  
SF 100.6077400 MHz  
WDW EM  
SSB 0  
LB 2.00 Hz  
GB 0  
PC 1.40

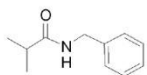

Amide 2  $^1\text{H}$  400 MHz,  $\text{CDCl}_3$

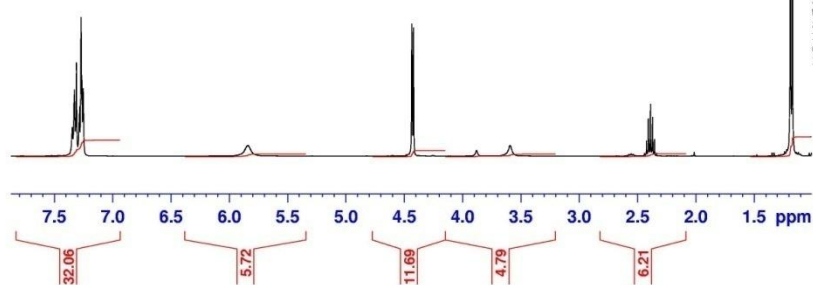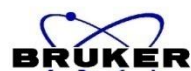

```

NAME      Jun21-2012-tchabenko
EXPNO     1
PROCNO    1
Date_     20120622
Time      1.24
INSTRUM   AVIII_400
PROBHD    5 mm PABBO BB-
PULPROG   zgpg30
ID        65536
SOLVENT   CDCl3
NS        16
DS        2
SWH       8223.685 Hz
FIDRES    0.125483 Hz
AQ        3.9846387 sec
RG        90.5
DW        60.800 usec
DE        17.04 usec
TE        300.1 K
D1        1.00000000 sec
TD0       1
    
```

```

===== CHANNEL f1 =====
NUC1      1H
P1        9.20 usec
PL1       -6.00 dB
PL1W      32.20000076 W
SFO1      400.1124708 MHz
SI        32768
SF        400.1100101 MHz
WDW       EM
SSB       0
LB        0.30 Hz
GB        0
PC        1.00
    
```

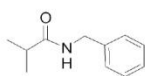

Amide 2  $^{13}\text{C}$  135 MHz,  $\text{CDCl}_3$

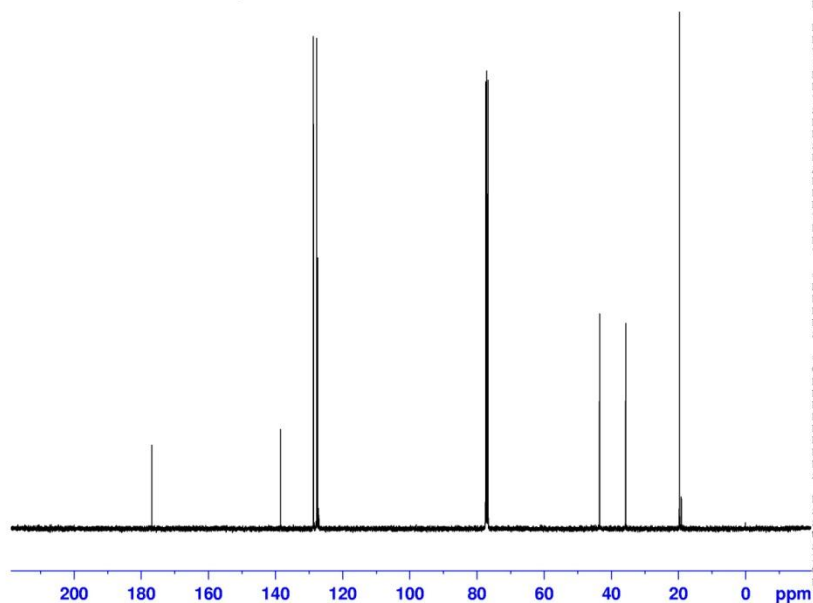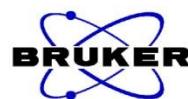

```

Current Data Parameters
NAME      Jun21-2012-tchabenko
EXPNO     1
PROCNO    1
    
```

```

F2 - Acquisition Parameters
Date_     20120622
Time      2.18
INSTRUM   AVIII_400
PROBHD    5 mm PABBO BB-
PULPROG   zgpg30
TD        96150
SOLVENT   CDCl3
NS        1024
DS        4
SWH       24038.461 Hz
FIDRES    0.250010 Hz
AQ        1.9999700 sec
RG        2050
DW        20.800 usec
DE        6.50 usec
TE        300.0 K
D1        1.00000000 sec
D11       0.03000000 sec
TD0       1
    
```

```

===== CHANNEL f1 =====
NUC1      13C
P1        8.00 usec
PL1       -4.30 dB
PL1W      96.67987061 W
SFO1      100.6178003 MHz
    
```

```

===== CHANNEL f2 =====
CPDPRG2   waltz64
NUC2      1H
PCPD2     60.00 usec
PL2       -6.00 dB
PL12      10.29 dB
PL13      13.29 dB
PL2W      32.20000076 W
PL12W     0.75658178 W
PL13W     0.37918913 W
SFO2      400.1116004 MHz
    
```

```

F2 - Processing parameters
SI        131072
SF        100.6077400 MHz
WDW       EM
SSB       0
LB        1.00 Hz
GB        0
PC        1.40
    
```

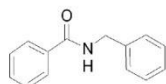

Amide 3  $^1\text{H}$  400 MHz,  $\text{CDCl}_3$

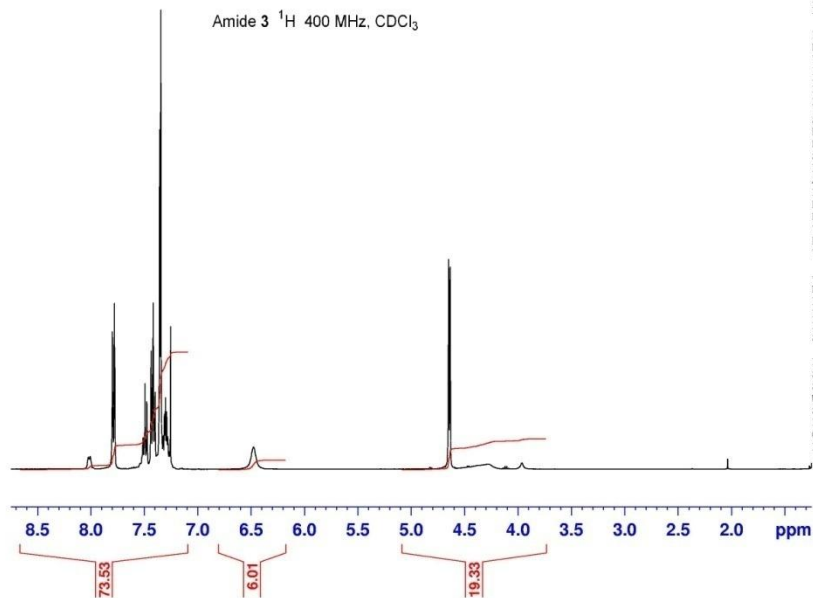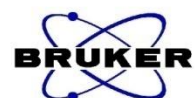

Current Data Parameters  
NAME Jun20-2012-tchabenko  
EXNO 10  
PROCNO 1

F2 - Acquisition Parameters  
Date\_ 20120621  
Time 5.41  
INSTRUM AVIII\_400  
PROBHD 5 mm PABBO BB-  
PULPROG zg30  
TD 65536  
SOLVENT CDCl3  
NS 16  
DS 2  
SWH 8223.685 Hz  
FIDRES 0.125483 Hz  
AQ 3.9846387 sec  
RG 144  
DW 60.800 usec  
DE 17.04 usec  
TE 300.3 K  
D1 1.0000000 sec  
TD0 1

----- CHANNEL f1 -----  
NUC1  $^1\text{H}$   
P1 9.20 usec  
PL1 -6.00 dB  
PL1W 32.20000076 W  
SFO1 400.1124708 MHz

F2 - Processing parameters  
SI 32768  
SF 400.1100128 MHz  
WEM EM  
SSB 0  
LB 0.30 Hz  
GB 0  
PC 1.00

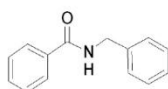

Amide 3  $^{13}\text{C}$  135 MHz,  $\text{CDCl}_3$

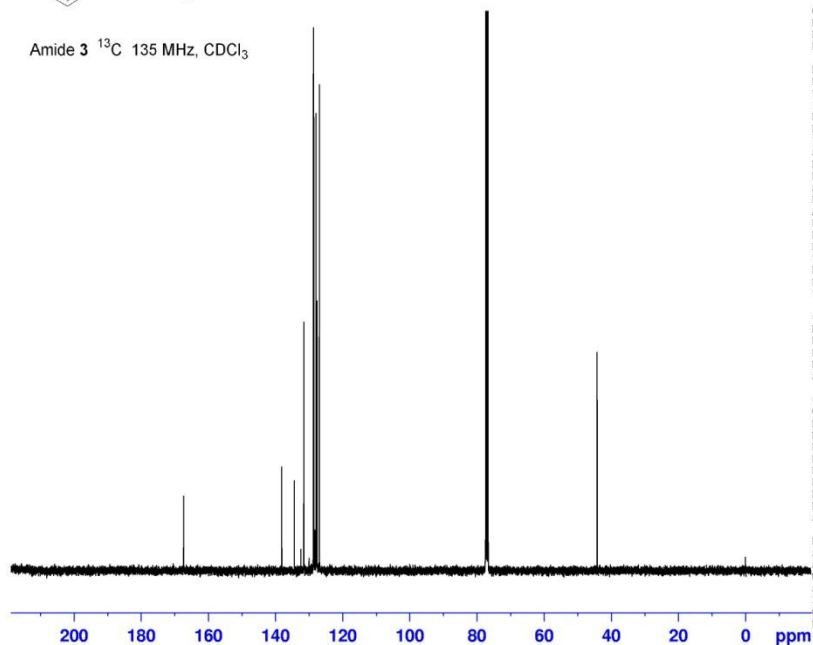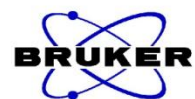

Current Data Parameters  
NAME Jun20-2012-tchabenko  
EXNO 11  
PROCNO 1

F2 - Acquisition Parameters  
Date\_ 20120621  
Time 6.35  
INSTRUM AVIII\_400  
PROBHD 5 mm PABBO BB-  
PULPROG zgpg30  
TD 96150  
SOLVENT CDCl3  
NS 1024  
DS 4  
SWH 24038.461 Hz  
FIDRES 0.250010 Hz  
AQ 1.9999700 sec  
RG 1820  
DW 20.800 usec  
DE 6.50 usec  
TE 300.2 K  
D1 1.0000000 sec  
D11 0.0300000 sec  
TD0 1

----- CHANNEL f1 -----  
NUC1  $^{13}\text{C}$   
P1 8.00 usec  
PL1 -4.30 dB  
PL1W 96.67987061 W  
SFO1 100.6178003 MHz

----- CHANNEL f2 -----  
CPDPRG2 waltz64  
NUC2  $^1\text{H}$   
P2 60.00 usec  
PL2 -6.00 dB  
PL12 10.29 dB  
PL13 13.29 dB  
PL2W 32.20000076 W  
PL12W 0.75658178 W  
PL13W 0.37918913 W  
SFO2 400.1116004 MHz

F2 - Processing parameters  
SI 131072  
SF 100.6077400 MHz  
WEM EM  
SSB 0  
LB 1.00 Hz  
GB 0  
PC 1.40

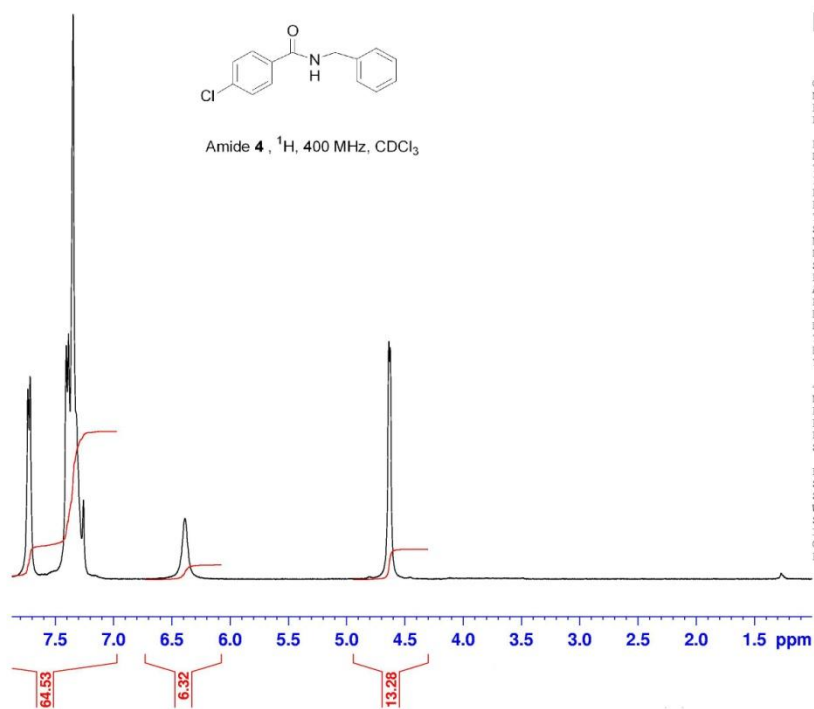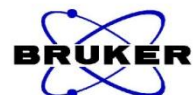

Current Data Parameters  
 NAME Sep07-2012-tchabenko  
 EXPNO 10  
 PROCNO 1

F2 - Acquisition Parameters  
 Date\_ 20120907  
 Time 9.55  
 INSTRUM AVIII\_400  
 PROBHD 5 mm PABBO BB-  
 PULPROG zg30  
 ID 65336  
 SOLVENT  $\text{CDCl}_3$   
 NS 16  
 DS 2  
 SWH 8223.685 Hz  
 FIDRES 0.125483 Hz  
 AQ 3.9846387 sec  
 RG 181  
 DW 60.800 usec  
 DE 16.66 usec  
 TE 303.2 K  
 D1 1.0000000 sec  
 TDO 1

----- CHANNEL f1 -----  
 NUC1  $^1\text{H}$   
 P1 11.00 usec  
 PL1 -6.00 dB  
 PL1W 32.20000076 W  
 SFO1 400.1124708 MHz

F2 - Processing parameters  
 SI 32768  
 SF 400.1100117 MHz  
 WDW EM  
 SSB 0  
 LB 0.30 Hz  
 GB 0  
 PC 1.00

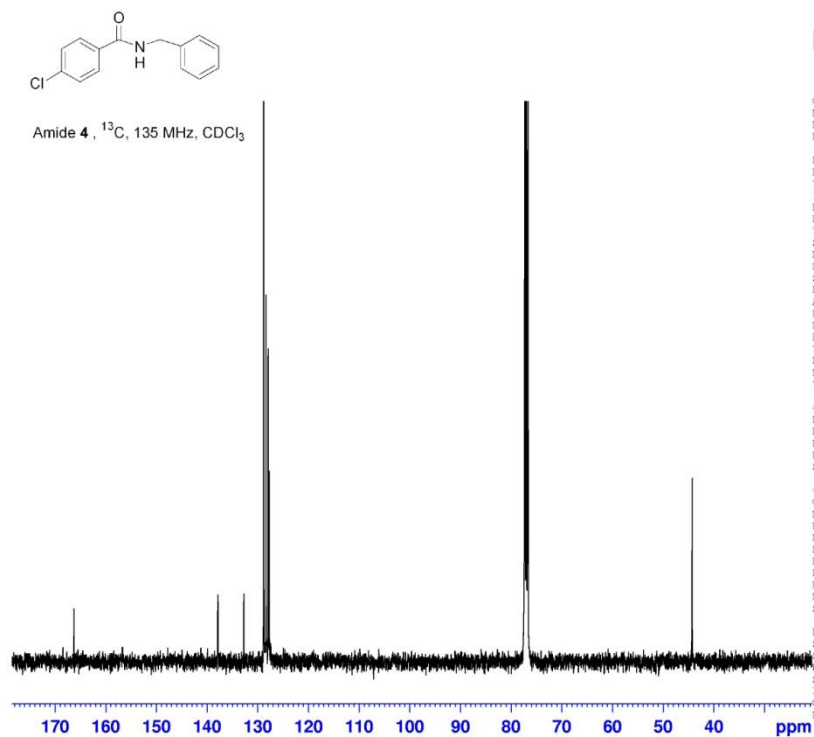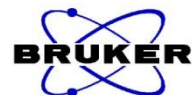

Current Data Parameters  
 NAME Sep07-2012-tchabenko  
 EXPNO 11  
 PROCNO 1

F2 - Acquisition Parameters  
 Date\_ 20120907  
 Time 10.49  
 INSTRUM AVIII\_400  
 PROBHD 5 mm PABBO BB-  
 PULPROG zgpg30  
 ID 96150  
 SOLVENT  $\text{CDCl}_3$   
 NS 1024  
 DS 4  
 SWH 24038.461 Hz  
 FIDRES 0.250010 Hz  
 AQ 1.9999700 sec  
 RG 1440  
 DW 20.800 usec  
 DE 6.50 usec  
 TE 303.2 K  
 D1 1.0000000 sec  
 D11 0.03000000 sec  
 TDO 1

----- CHANNEL f1 -----  
 NUC1  $^{13}\text{C}$   
 P1 9.00 usec  
 PL1 -4.50 dB  
 PL1W 96.67987061 W  
 SFO1 100.6178003 MHz

----- CHANNEL f2 -----  
 CPDPRG2 waltz64  
 NUC2  $^1\text{H}$   
 FPCP2 60.00 usec  
 PL2 -6.00 dB  
 PL12 8.74 dB  
 PL13 13.29 dB  
 PL2W 32.20000076 W  
 PL12W 1.08107519 W  
 PL13W 0.37918913 W  
 SFO2 400.1116004 MHz

F2 - Processing parameters  
 SI 131072  
 SF 100.6077400 MHz  
 WDW EM  
 SSB 0  
 LB 2.00 Hz  
 GB 0  
 PC 1.40

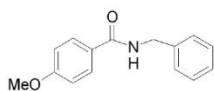

Amide 5,  $^1\text{H}$ , 400 MHz,  $\text{CDCl}_3$

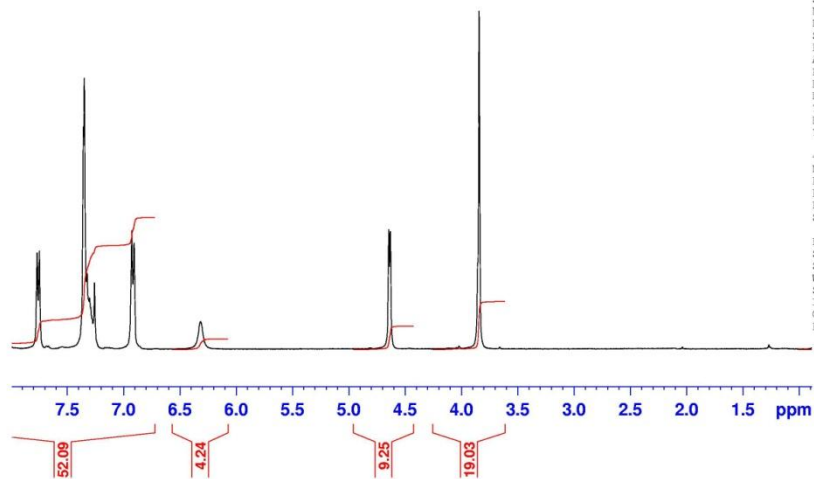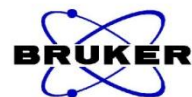

Current Data Parameters  
 NAME Sep06-2012-tchabenko  
 EXPNO 10  
 PROCNO 1

F2 - Acquisition Parameters  
 Date\_ 20120906  
 Time 12.50  
 INSTRUM AVIII\_400  
 PROBHD 5 mm PABBO BB-  
 PULPROG zg30  
 ID 65336  
 SOLVENT  $\text{CDCl}_3$   
 NS 16  
 DS 2  
 SWH 8223.685 Hz  
 FIDRES 0.125483 Hz  
 AQ 3.9846387 sec  
 RG 203  
 DW 60.800 usec  
 DE 16.66 usec  
 TE 303.2 K  
 D1 1.0000000 sec  
 TDO 1

===== CHANNEL f1 =====  
 NUC1  $^1\text{H}$   
 P1 11.00 usec  
 PL1 -6.00 dB  
 PL1W 32.20000076 W  
 SFO1 400.1124708 MHz

F2 - Processing parameters  
 SI 32768  
 SF 400.1100111 MHz  
 WDW EM  
 SSB 0  
 LB 0.30 Hz  
 GB 0  
 PC 1.00

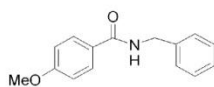

Amide 5,  $^{13}\text{C}$ , 135 MHz,  $\text{CDCl}_3$

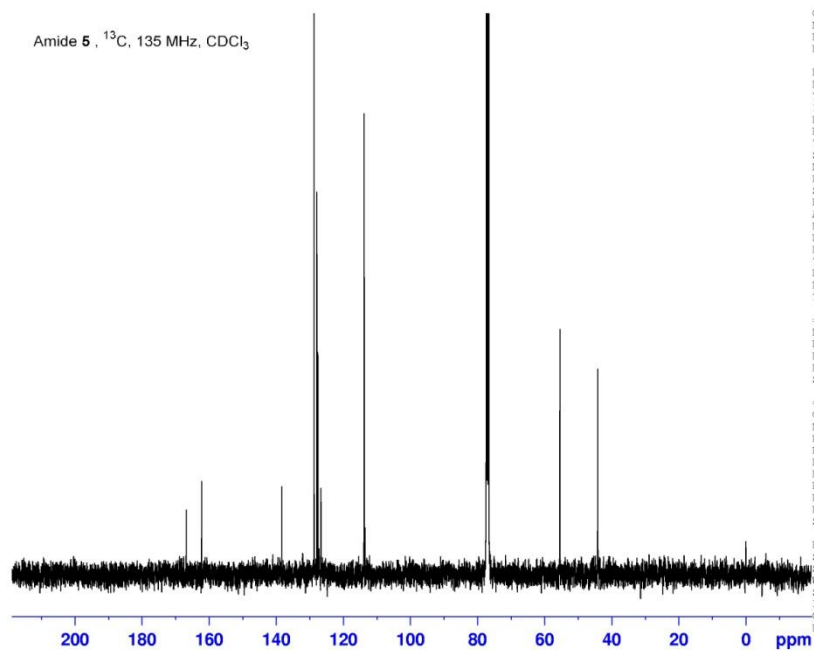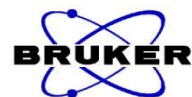

Current Data Parameters  
 NAME Sep06-2012-tchabenko  
 EXPNO 11  
 PROCNO 1

F2 - Acquisition Parameters  
 Date\_ 20120906  
 Time 22.07  
 INSTRUM AVIII\_400  
 PROBHD 5 mm PABBO BB-  
 PULPROG zgpg30  
 ID 96150  
 SOLVENT  $\text{CDCl}_3$   
 NS 1024  
 DS 4  
 SWH 24038.461 Hz  
 FIDRES 0.250010 Hz  
 AQ 1.9999700 sec  
 RG 2050  
 DW 20.800 usec  
 DE 6.50 usec  
 TE 303.2 K  
 D1 1.0000000 sec  
 D11 0.03000000 sec  
 TDO 1

===== CHANNEL f1 =====  
 NUC1  $^{13}\text{C}$   
 P1 9.00 usec  
 PL1 -4.30 dB  
 PL1W 96.67987061 W  
 SFO1 100.6178003 MHz

===== CHANNEL f2 =====  
 CPDPRG2 waltz64  
 NUC2  $^1\text{H}$   
 PCPD2 60.00 usec  
 PL2 -6.00 dB  
 PL12 8.74 dB  
 PL13 13.29 dB  
 PL2W 32.20000076 W  
 PL12W 1.08107519 W  
 PL13W 0.37918913 W  
 SFO2 400.1116004 MHz

F2 - Processing parameters  
 SI 131072  
 SF 100.6077400 MHz  
 WDW EM  
 SSB 0  
 LB 2.00 Hz  
 GB 0  
 PC 1.40

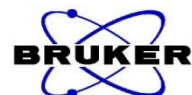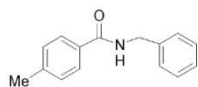

Amide 6, <sup>1</sup>H, 400 MHz, CDCl<sub>3</sub>

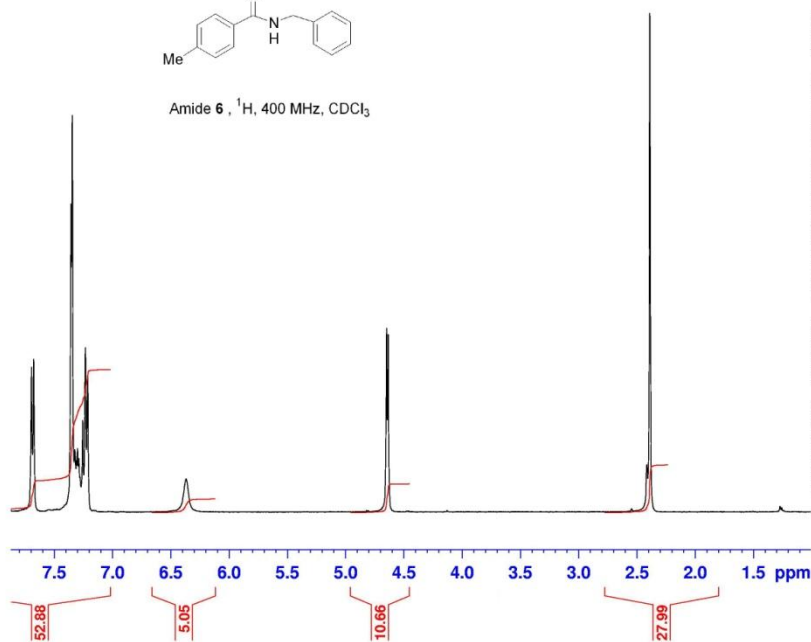

Current Data Parameters  
NAME Sep07-2012-tchabenko  
EXPNO 20  
PROCNO 1

F2 - Acquisition Parameters  
Date\_ 20120907  
Time 13.58  
INSTRUM AVIII\_400  
PROBHD 5 mm PABBO BB-  
PULPROG zg30  
TD 65336  
SOLVENT CDCl3  
NS 16  
DS 2  
SWH 8223.685 Hz  
FIDRES 0.125483 Hz  
AQ 3.9846387 sec  
RG 181  
DW 60.800 usec  
DE 16.66 usec  
TE 303.2 K  
D1 1.0000000 sec  
TDO 1

===== CHANNEL f1 =====  
NUC1 1H  
P1 11.00 usec  
PL1 -6.00 dB  
PL1W 32.20000076 W  
SFO1 400.1124708 MHz

F2 - Processing parameters  
SI 32768  
SF 400.1100119 MHz  
WDW EM  
SSB 0  
LB 0.30 Hz  
GB 0  
PC 1.00

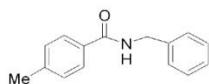

Amide 6, <sup>13</sup>C, 135 MHz, CDCl<sub>3</sub>

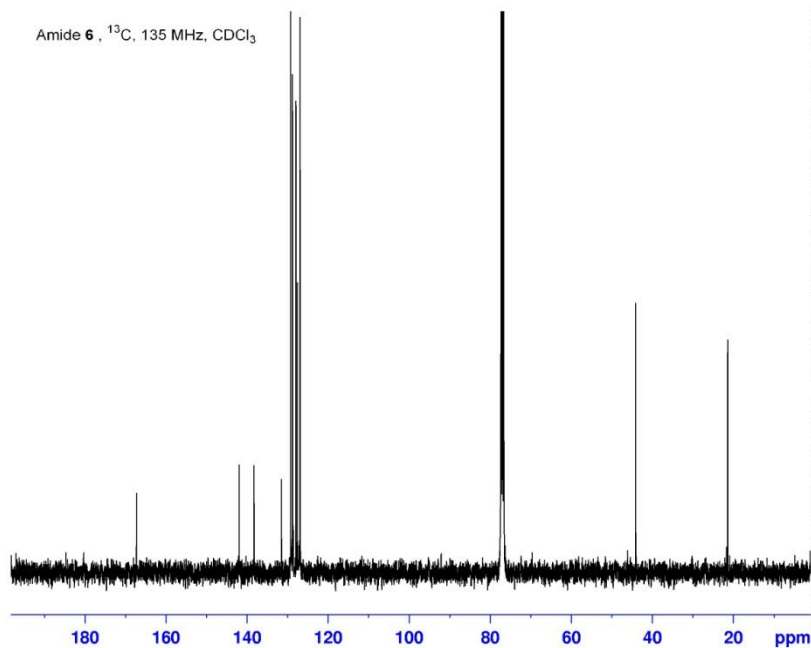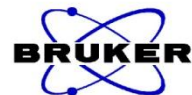

Current Data Parameters  
NAME Sep07-2012-tchabenko  
EXPNO 21  
PROCNO 1

F2 - Acquisition Parameters  
Date\_ 20120907  
Time 14.51  
INSTRUM AVIII\_400  
PROBHD 5 mm PABBO BB-  
PULPROG zgpg30  
TD 96150  
SOLVENT CDCl3  
NS 1024  
DS 4  
SWH 24038.461 Hz  
FIDRES 0.250010 Hz  
AQ 1.9999700 sec  
RG 1820  
DW 20.800 usec  
DE 6.50 usec  
TE 303.2 K  
D1 1.0000000 sec  
D11 0.03000000 sec  
TDO 1

===== CHANNEL f1 =====  
NUC1 13C  
P1 9.00 usec  
PL1 -4.30 dB  
PL1W 96.67987061 W  
SFO1 100.6178003 MHz

===== CHANNEL f2 =====  
CPDPRG2 waltz64  
NUC2 1H  
PCPD2 60.00 usec  
PL2 -6.00 dB  
PL12 8.74 dB  
PL13 13.29 dB  
PL2W 32.20000076 W  
PL12W 1.08107519 W  
PL13W 0.37918913 W  
SFO2 400.1116004 MHz

F2 - Processing parameters  
SI 131072  
SF 100.6077400 MHz  
WDW EM  
SSB 0  
LB 2.00 Hz  
GB 0  
PC 1.40



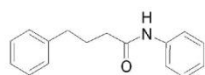

Amide 7,  $^1\text{H}$ , 400 MHz,  $\text{CDCl}_3$

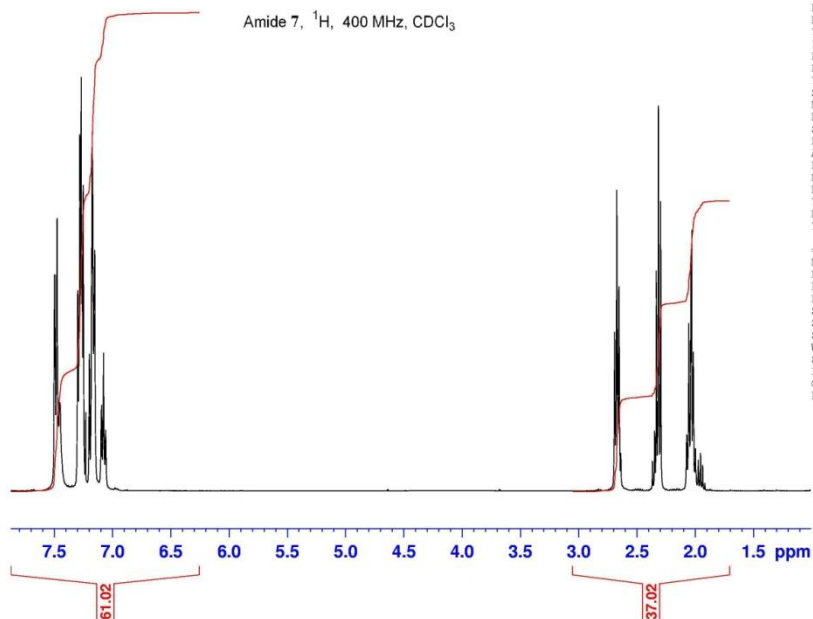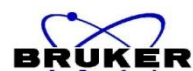

```

NAME Jun25-2012-tchabenko
EXPNO 25
PROCNO 1
Date_ 20120626
Time 8.16
INSTRUM AVIII_400
PROBHD 5 mm PABBO BB-
PULPROG zg30
ID 65536
SOLVENT CDCl3
NS 16
DS 2
SWH 8223.685 Hz
FIDRES 0.125483 Hz
AQ 3.9846387 sec
RG 50.8
DW 60.800 usec
DE 17.04 usec
TE 299.9 K
D1 1.0000000 sec
TDO 1
    
```

```

===== CHANNEL f1 =====
NUC1 1H
P1 9.20 usec
PL1 -6.00 dB
PL1W 32.20000076 W
SFO1 400.1124708 MHz
SI 32768
SF 400.1100219 MHz
WDW EM
SSB 0
LB 0.30 Hz
GB 0
PC 1.00
    
```

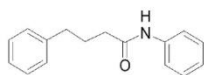

Amide 7,  $^{13}\text{C}$ , 135 MHz,  $\text{CDCl}_3$

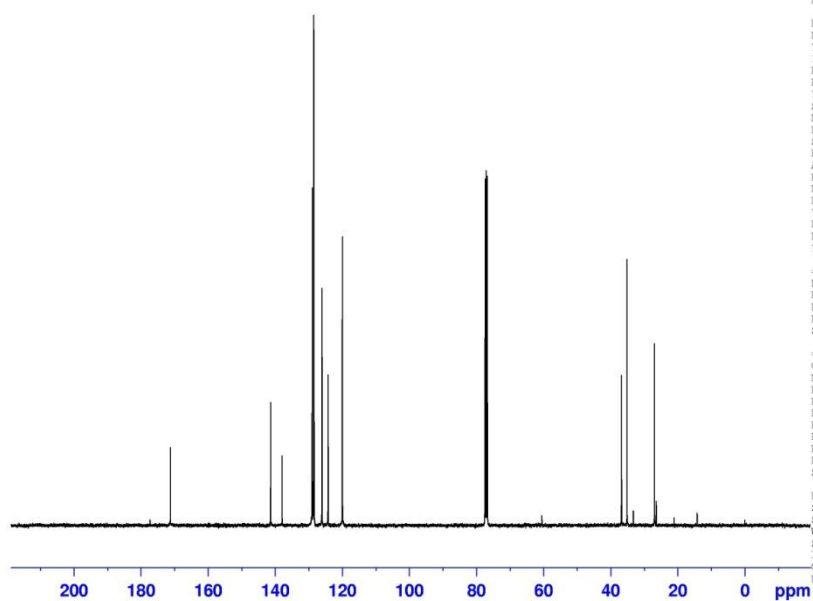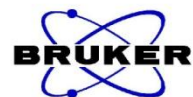

```

Current Data Parameters
NAME Jun25-2012-tchabenko
EXPNO 28
PROCNO 1
    
```

```

F2 - Acquisition Parameters
Date_ 20120626
Time 9.46
INSTRUM AVIII_400
PROBHD 5 mm PABBO BB-
PULPROG zgpg30
ID 96150
SOLVENT CDCl3
NS 1024
DS 4
SWH 24038.461 Hz
FIDRES 0.250010 Hz
AQ 1.9999700 sec
RG 2050
DW 20.800 usec
DE 6.50 usec
TE 300.7 K
D1 1.0000000 sec
D11 0.0300000 sec
TDO 1
    
```

```

===== CHANNEL f1 =====
NUC1 13C
P1 8.00 usec
PL1 -4.30 dB
PL1W 96.67987061 W
SFO1 100.6178003 MHz
    
```

```

===== CHANNEL f2 =====
CPDPRG2 waltz64
NUC2 1H
PCPD2 60.00 usec
PL2 -6.00 dB
PL12 10.29 dB
PL13 13.29 dB
PL2W 32.20000076 W
PL12W 0.75658178 W
PL13W 0.37918913 W
SFO2 400.1116004 MHz
    
```

```

F2 - Processing parameters
SI 131072
SF 100.6077400 MHz
WDW EM
SSB 0
LB 2.00 Hz
GB 0
PC 1.40
    
```

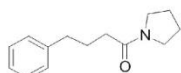

Amide 8  $^1\text{H}$  400 MHz,  $\text{CDCl}_3$

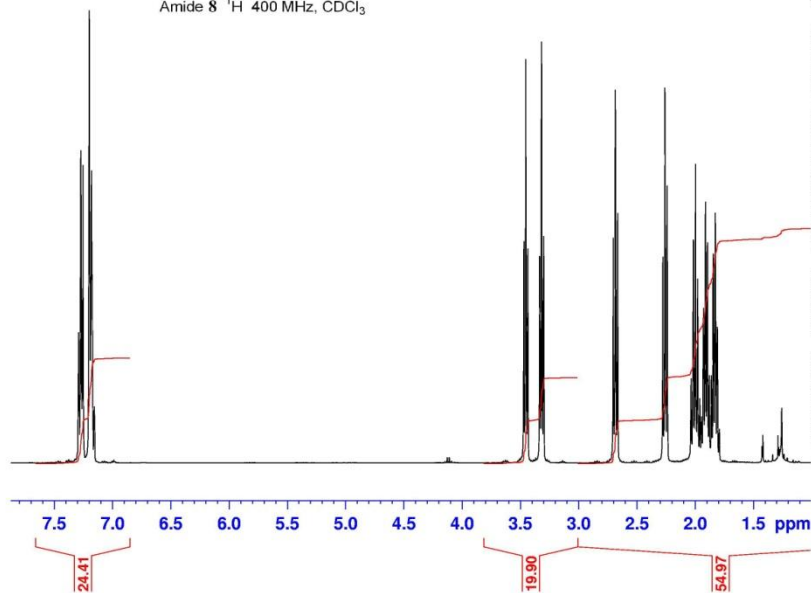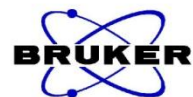

Current Data Parameters  
 NAME Jun28-2012-tchabenko  
 EXPNO 10  
 PROCNO 1

F2 - Acquisition Parameters  
 Date\_ 20120628  
 Time 16.12  
 INSTRUM AVIII\_400  
 PROBHD 5 mm PABBO BB-  
 PULPROG zg30  
 TD 65336  
 SOLVENT  $\text{CDCl}_3$   
 NS 16  
 DS 2  
 SWH 8223.685 Hz  
 FIDRES 0.125483 Hz  
 AQ 3.9846387 sec  
 RG 71.8  
 DW 60.800 usec  
 DE 17.04 usec  
 TE 300.0 K  
 D1 1.0000000 sec  
 TDO 1

===== CHANNEL f1 =====  
 NUC1  $^1\text{H}$   
 P1 9.20 usec  
 PL1 -6.00 dB  
 PL1W 32.2000076 W  
 SFO1 400.1124708 MHz

F2 - Processing parameters  
 SI 32768  
 SF 400.1100091 MHz  
 WDW EM  
 SSB 0  
 LB 0.30 Hz  
 GB 0  
 PC 1.00

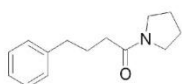

Amide 8  $^{13}\text{C}$  135 MHz,  $\text{CDCl}_3$

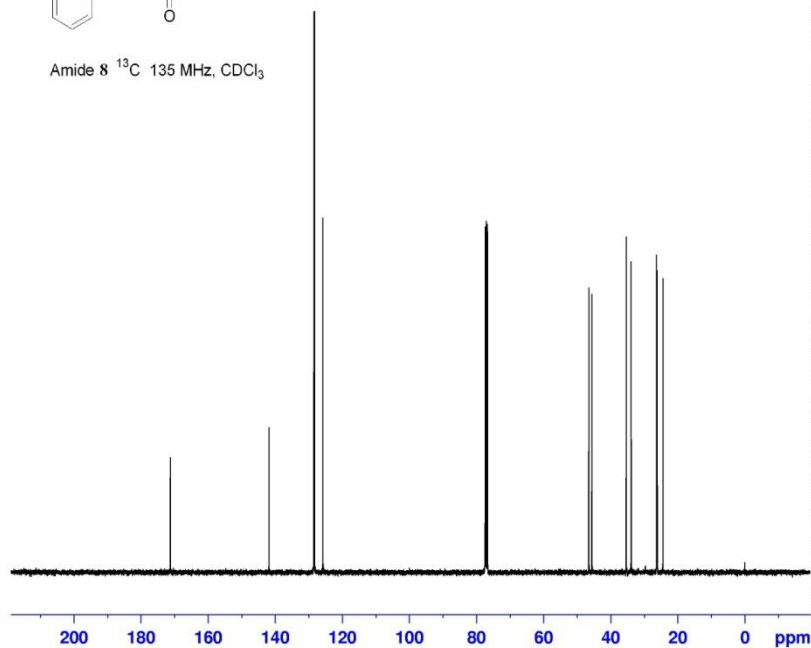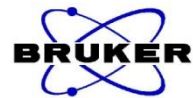

Current Data Parameters  
 NAME Jun28-2012-tchabenko  
 EXPNO 11  
 PROCNO 1

F2 - Acquisition Parameters  
 Date\_ 20120628  
 Time 21.28  
 INSTRUM AVIII\_400  
 PROBHD 5 mm PABBO BB-  
 PULPROG zgpg30  
 TD 96150  
 SOLVENT  $\text{CDCl}_3$   
 NS 1024  
 DS 4  
 SWH 24038.461 Hz  
 FIDRES 0.250010 Hz  
 AQ 1.9999700 sec  
 RG 2050  
 DW 20.800 usec  
 DE 6.50 usec  
 TE 300.0 K  
 D1 1.0000000 sec  
 D11 0.0300000 sec  
 TDO 1

===== CHANNEL f1 =====  
 NUC1  $^{13}\text{C}$   
 P1 8.00 usec  
 PL1 -4.30 dB  
 PL1W 96.67987061 W  
 SFO1 100.6178003 MHz

===== CHANNEL f2 =====  
 CPDPRG2 waltz64  
 NUC2  $^1\text{H}$   
 FPCPD2 60.00 usec  
 PL2 -6.00 dB  
 PL12 10.29 dB  
 PL13 13.29 dB  
 PL2W 32.2000076 W  
 PL12W 0.75658178 W  
 PL13W 0.37918913 W  
 SFO2 400.1116004 MHz

F2 - Processing parameters  
 SI 131072  
 SF 100.6077400 MHz  
 WDW EM  
 SSB 0  
 LB 1.00 Hz  
 GB 0  
 PC 1.40

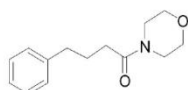

Amide 9 <sup>1</sup>H 400 MHz, CDCl<sub>3</sub>

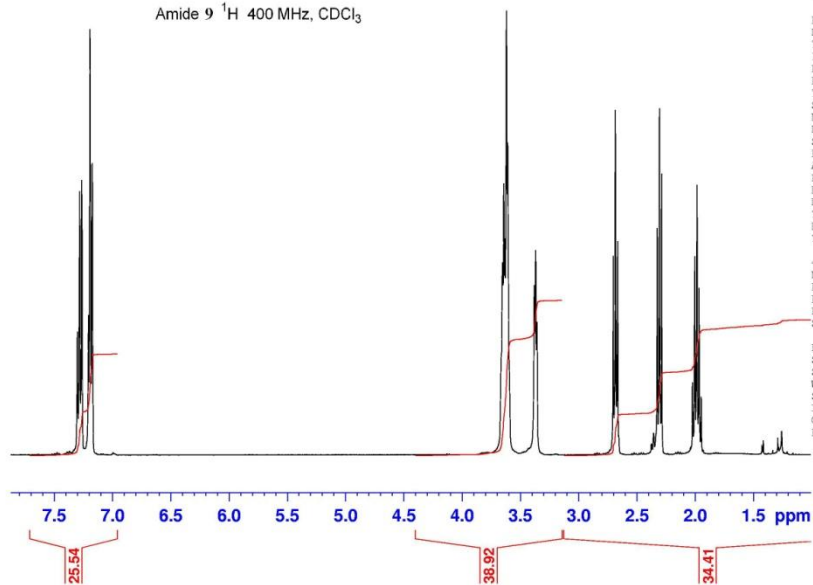

Current Data Parameters  
 NAME Jun26-2012-tchabenko  
 EXPNO 10  
 PROCNO 1

F2 - Acquisition Parameters  
 Date\_ 20120627  
 Time 6.03  
 INSTRUM AVIII\_400  
 PROBHD 5 mm PABBO BB-  
 PULPROG zg30  
 ID 65336  
 SOLVENT CDCl3  
 NS 16  
 DS 2  
 SWH 8223.685 Hz  
 FIDRES 0.125483 Hz  
 AQ 3.9846387 sec  
 RG 114  
 DW 60.800 usec  
 DE 17.04 usec  
 TE 300.0 K  
 D1 1.0000000 sec  
 TDO 1

===== CHANNEL f1 =====  
 NUC1 1H  
 P1 9.20 usec  
 PL1 -6.00 dB  
 PL1W 32.20000076 W  
 SFO1 400.1124708 MHz

F2 - Processing parameters  
 SI 32768  
 SF 400.1100104 MHz  
 WDW EM  
 SSB 0  
 LB 0.30 Hz  
 GB 0  
 PC 1.00

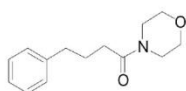

Amide 9 <sup>13</sup>C 135 MHz, CDCl<sub>3</sub>

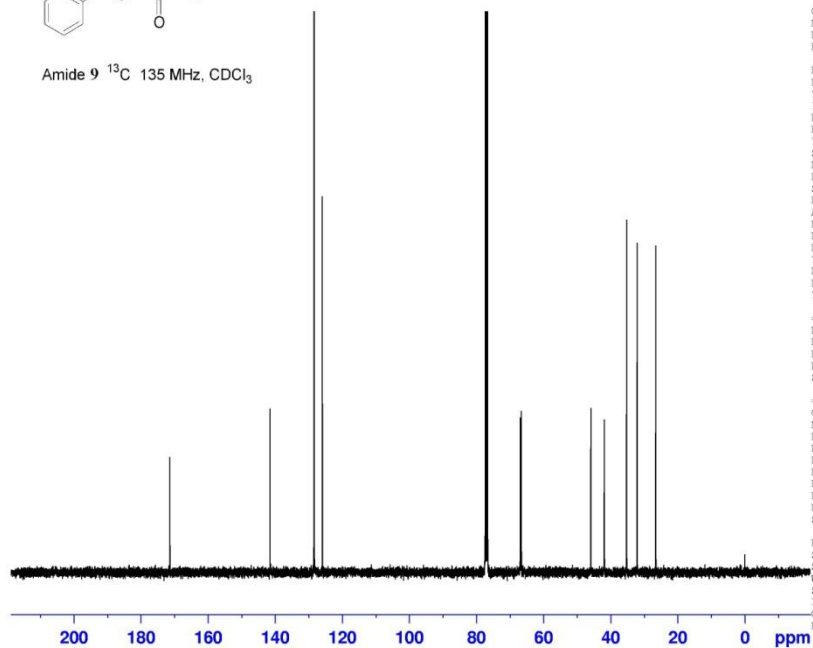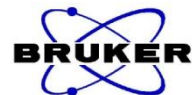

Current Data Parameters  
 NAME Jun26-2012-tchabenko  
 EXPNO 11  
 PROCNO 1

F2 - Acquisition Parameters  
 Date\_ 20120627  
 Time 6.57  
 INSTRUM AVIII\_400  
 PROBHD 5 mm PABBO BB-  
 PULPROG zgpg30  
 ID 96150  
 SOLVENT CDCl3  
 NS 1024  
 DS 4  
 SWH 24038.461 Hz  
 FIDRES 0.250010 Hz  
 AQ 1.9999700 sec  
 RG 2050  
 DW 20.800 usec  
 DE 6.50 usec  
 TE 301.0 K  
 D1 1.0000000 sec  
 D11 0.03000000 sec  
 TDO 1

===== CHANNEL f1 =====  
 NUC1 13C  
 P1 8.00 usec  
 PL1 -4.30 dB  
 PL1W 96.67987061 W  
 SFO1 100.6178003 MHz

===== CHANNEL f2 =====  
 CPDPRG2 waltz64  
 NUC2 1H  
 F2PCP2 60.00 usec  
 PL2 -6.00 dB  
 PL12 10.29 dB  
 PL13 13.29 dB  
 PL2W 32.20000076 W  
 PL12W 0.75658178 W  
 PL13W 0.37918913 W  
 SFO2 400.1116004 MHz

F2 - Processing parameters  
 SI 131072  
 SF 100.6077400 MHz  
 WDW EM  
 SSB 0  
 LB 1.00 Hz  
 GB 0  
 PC 1.40

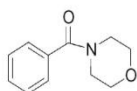

Amide 10 <sup>1</sup>H, 400 MHz, D<sub>6</sub>-DMSO, 90°C

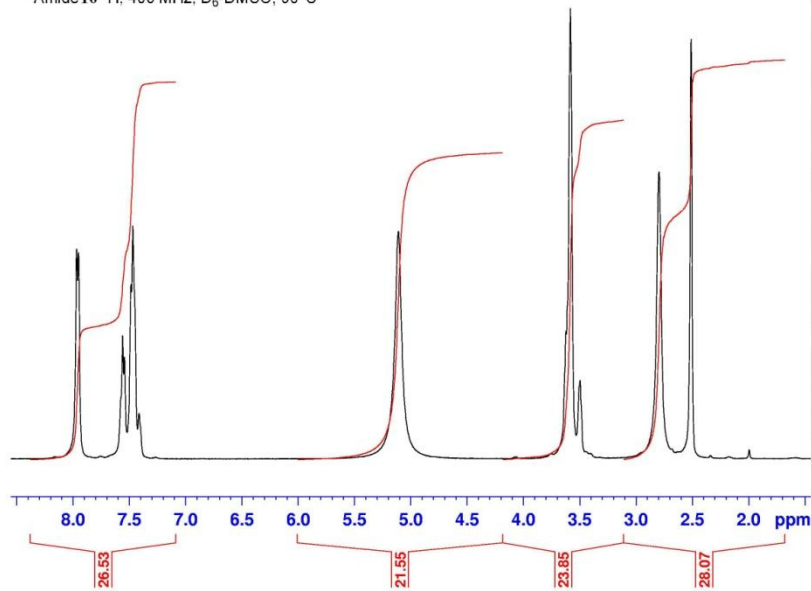

Current Data Parameters  
NAME Jul27-2012-tchabenko  
EXPNO 12  
PROCNO 1

F2 - Acquisition Parameters  
Date\_ 20120727  
Time 12.53  
INSTRUM AVIII\_400  
PROBHD 5 mm PABBO BB-  
PULPROG zg30  
TD 65336  
SOLVENT DMSO  
NS 16  
DS 2  
SWH 8223.685 Hz  
FIDRES 0.125483 Hz  
AQ 3.9846387 sec  
RG 101  
DW 60.800 usec  
DE 16.66 usec  
TE 363.6 K  
D1 1.0000000 sec  
TD0 1

----- CHANNEL f1 -----  
NUC1 1H  
P1 11.00 usec  
PL1 -6.00 dB  
PL1W 32.20000076 W  
SFO1 400.1124708 MHz

F2 - Processing parameters  
SI 32768  
SF 400.1100000 MHz  
WDW EM  
SSB 0  
LB 0.30 Hz  
GB 0  
PC 1.00

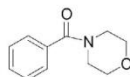

Amide 10 <sup>13</sup>C, 135 MHz, D<sub>6</sub>-DMSO

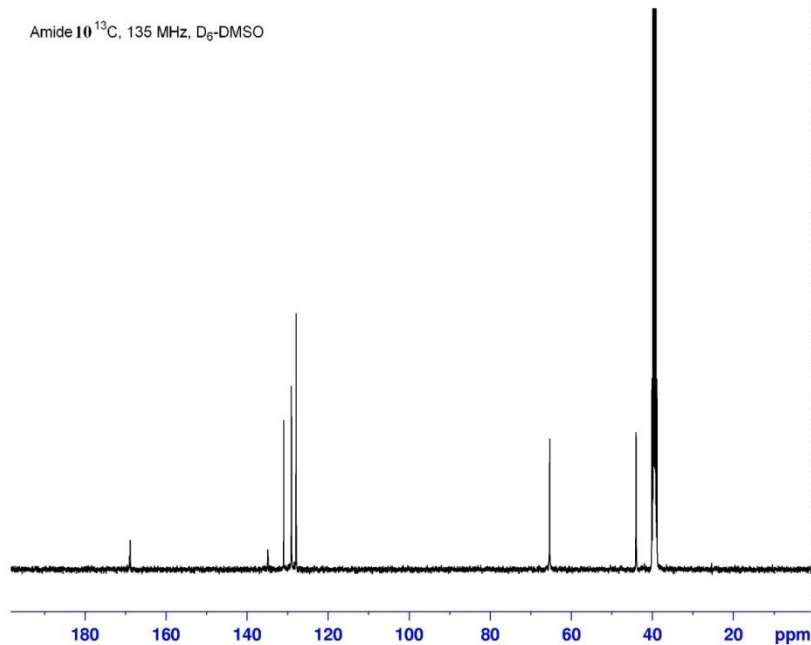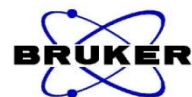

Current Data Parameters  
NAME Jul27-2012-tchabenko  
EXPNO 11  
PROCNO 1

F2 - Acquisition Parameters  
Date\_ 20120727  
Time 12.17  
INSTRUM AVIII\_400  
PROBHD 5 mm PABBO BB-  
PULPROG zgpg30  
TD 96150  
SOLVENT DMSO  
NS 1024  
DS 4  
SWH 24038.461 Hz  
FIDRES 0.250010 Hz  
AQ 1.9999700 sec  
RG 1820  
DW 20.800 usec  
DE 6.50 usec  
TE 300.2 K  
D1 1.0000000 sec  
D11 0.0300000 sec  
TD0 1

===== CHANNEL f1 =====  
NUC1 13C  
P1 9.00 usec  
PL1 -4.30 dB  
PL1W 96.67987061 W  
SFO1 100.6178003 MHz

===== CHANNEL f2 =====  
CPDPRG2 waltz64  
NUC2 1H  
PCPD2 60.00 usec  
PL2 -6.00 dB  
PL12 8.74 dB  
PL13 13.29 dB  
PL2W 32.20000076 W  
PL12W 1.08107519 W  
PL13W 0.37918913 W  
SFO2 400.1116004 MHz

F2 - Processing parameters  
SI 131072  
SF 100.6077903 MHz  
WDW EM  
SSB 0  
LB 2.00 Hz  
GB 0  
PC 1.40

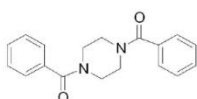

Amide 11,  $^1\text{H}$ , 400 MHz,  $\text{D}_6\text{-DMSO}$ ,  $90^\circ\text{C}$

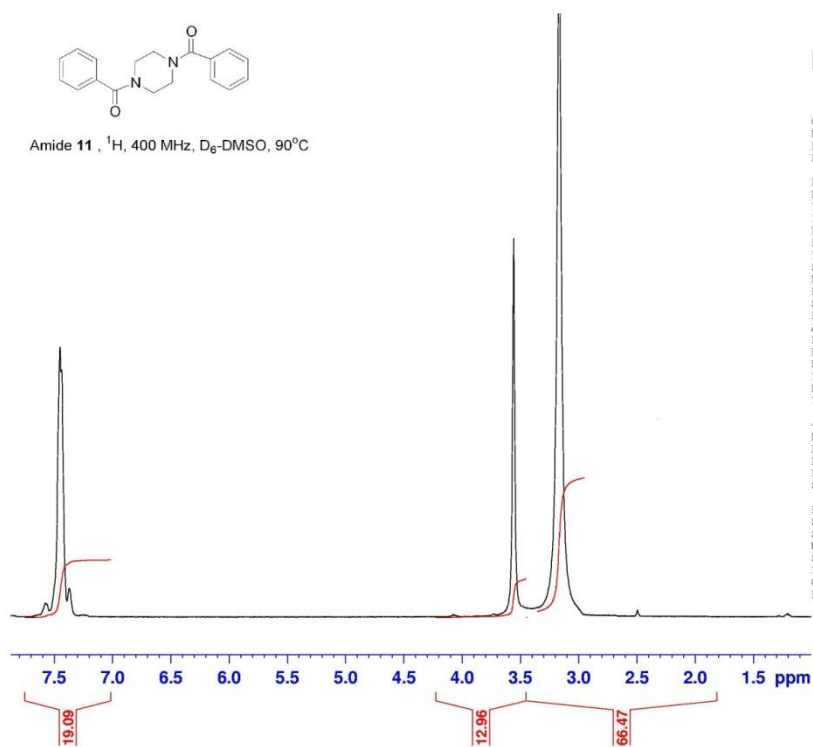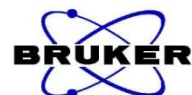

Current Data Parameters  
 NAME Sep08-2012-tchabenko  
 EXPNO 20  
 PROCNO 1

F2 - Acquisition Parameters  
 Date\_ 20120908  
 Time 14.38  
 INSTRUM AVIII\_400  
 PROBHD 5 mm PABBO BB-  
 PULPROG zg30  
 TD 65336  
 SOLVENT DMSO  
 NS 16  
 DS 2  
 SWH 8223.685 Hz  
 FIDRES 0.125483 Hz  
 AQ 3.9846387 sec  
 RG 128  
 DW 60.800 usec  
 DE 16.66 usec  
 TE 362.5 K  
 D1 1.0000000 sec  
 TDO 1

===== CHANNEL f1 =====  
 NUC1  $^1\text{H}$   
 P1 11.00 usec  
 PL1 -6.00 dB  
 PL1W 32.20000076 W  
 SFO1 400.1124708 MHz

F2 - Processing parameters  
 SI 32768  
 SF 400.1100000 MHz  
 WDW EM  
 SSB 0  
 LB 0.30 Hz  
 GB 0  
 PC 1.00

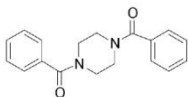

Amide 11,  $^{13}\text{C}$ , 135 MHz,  $\text{D}_6\text{-DMSO}$ ,  $90^\circ\text{C}$

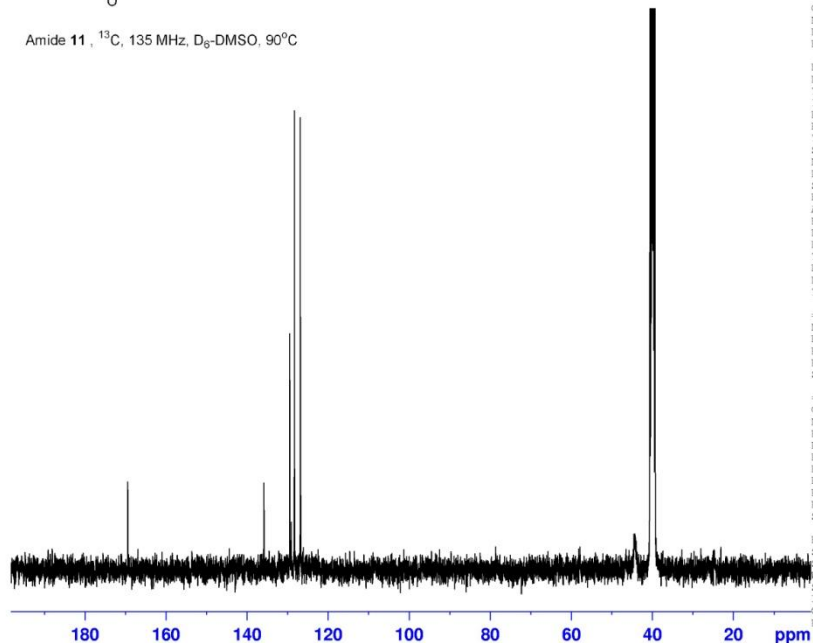

Current Data Parameters  
 NAME Sep08-2012-tchabenko  
 EXPNO 21  
 PROCNO 1

F2 - Acquisition Parameters  
 Date\_ 20120908  
 Time 15.02  
 INSTRUM AVIII\_400  
 PROBHD 5 mm PABBO BB-  
 PULPROG zgpg30  
 TD 96150  
 SOLVENT DMSO  
 NS 1024  
 DS 4  
 SWH 24038.461 Hz  
 FIDRES 0.250010 Hz  
 AQ 1.9999700 sec  
 RG 2050  
 DW 20.800 usec  
 DE 6.50 usec  
 TE 363.2 K  
 D1 1.0000000 sec  
 D11 0.0300000 sec  
 TDO 1

===== CHANNEL f1 =====  
 NUC1  $^{13}\text{C}$   
 P1 9.00 usec  
 PL1 -4.30 dB  
 PL1W 96.67987061 W  
 SFO1 100.6178003 MHz

===== CHANNEL f2 =====  
 CPDPRG2 waltz64  
 NUC2  $^1\text{H}$   
 PCPD2 60.00 usec  
 PL2 -6.00 dB  
 PL12 8.74 dB  
 PL13 13.29 dB  
 PL2W 32.20000076 W  
 PL12W 1.08107519 W  
 PL13W 0.37918913 W  
 SFO2 400.1116004 MHz

F2 - Processing parameters  
 SI 131072  
 SF 100.6077903 MHz  
 WDW EM  
 SSB 0  
 LB 2.00 Hz  
 GB 0  
 PC 1.40

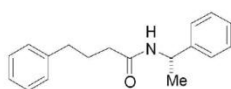

Amide 12  $^1\text{H}$ , 400 MHz,  $\text{CDCl}_3$

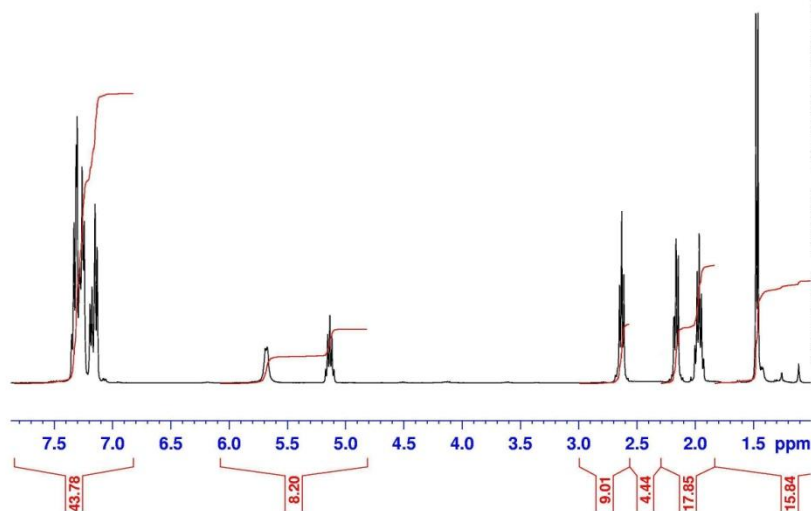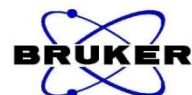

Current Data Parameters  
 NAME Jul24-2012-tchabenko  
 EXPNO 20  
 PROCNO 1

F2 - Acquisition Parameters  
 Date\_ 20120724  
 Time 22.46  
 INSTRUM AVIII\_400  
 PROBHD 5 mm PABBO BB-  
 PULPROG zg30  
 TD 65336  
 SOLVENT  $\text{CDCl}_3$   
 NS 16  
 DS 2  
 SWH 8223.685 Hz  
 FIDRES 0.125483 Hz  
 AQ 3.9846387 sec  
 RG 64  
 DW 60.800 usec  
 DE 16.66 usec  
 TE 298.6 K  
 D1 1.0000000 sec  
 TDO 1

===== CHANNEL f1 =====  
 NUC1  $^1\text{H}$   
 P1 11.00 usec  
 PL1 -6.00 dB  
 PL1W 32.20000076 W  
 SFO1 400.1124708 MHz

F2 - Processing parameters  
 SI 32768  
 SF 400.1100146 MHz  
 WDW EM  
 SSB 0  
 LB 0.30 Hz  
 GB 0  
 PC 1.00

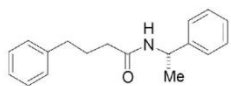

Amide 12  $^{13}\text{C}$ , 135 MHz,  $\text{CDCl}_3$

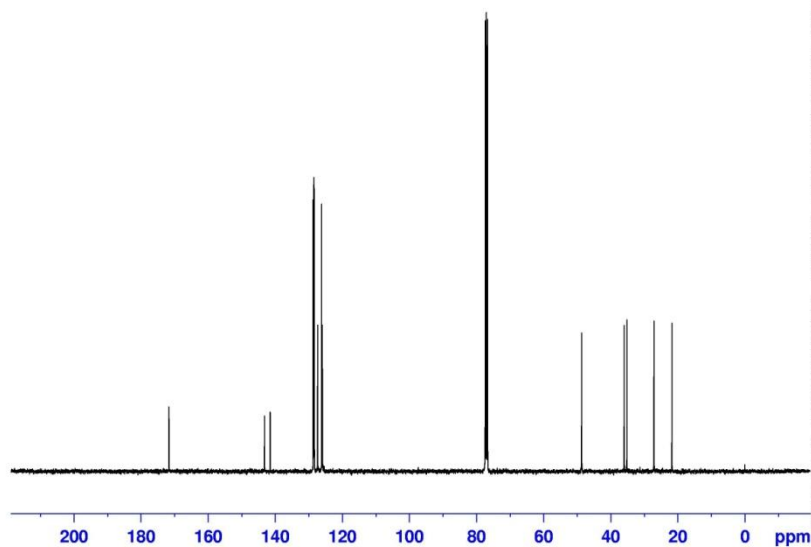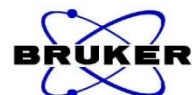

Current Data Parameters  
 NAME Jul24-2012-tchabenko  
 EXPNO 21  
 PROCNO 1

F2 - Acquisition Parameters  
 Date\_ 20120724  
 Time 23.40  
 INSTRUM AVIII\_400  
 PROBHD 5 mm PABBO BB-  
 PULPROG zgpg30  
 TD 96150  
 SOLVENT  $\text{CDCl}_3$   
 NS 1024  
 DS 4  
 SWH 24038.461 Hz  
 FIDRES 0.250010 Hz  
 AQ 1.9999700 sec  
 RG 1290  
 DW 20.800 usec  
 DE 6.50 usec  
 TE 300.2 K  
 D1 1.0000000 sec  
 D11 0.03000000 sec  
 TDO 1

===== CHANNEL f1 =====  
 NUC1  $^{13}\text{C}$   
 P1 9.00 usec  
 PL1 -4.30 dB  
 PL1W 96.67987061 W  
 SFO1 100.6178003 MHz

===== CHANNEL f2 =====  
 CPDPRG2 waltz64  
 NUC2  $^1\text{H}$   
 FPCP02 60.00 usec  
 PL2 -6.00 dB  
 PL12 8.74 dB  
 PL13 13.29 dB  
 PL2W 32.20000076 W  
 PL12W 1.08107519 W  
 PL13W 0.37918913 W  
 SFO2 400.1116004 MHz

F2 - Processing parameters  
 SI 131072  
 SF 100.6077400 MHz  
 WDW EM  
 SSB 0  
 LB 2.00 Hz  
 CB 0  
 PC 1.40

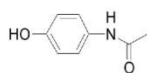

Amide13(paracetamol) <sup>1</sup>H 400MHz, D<sub>6</sub>-DMSO

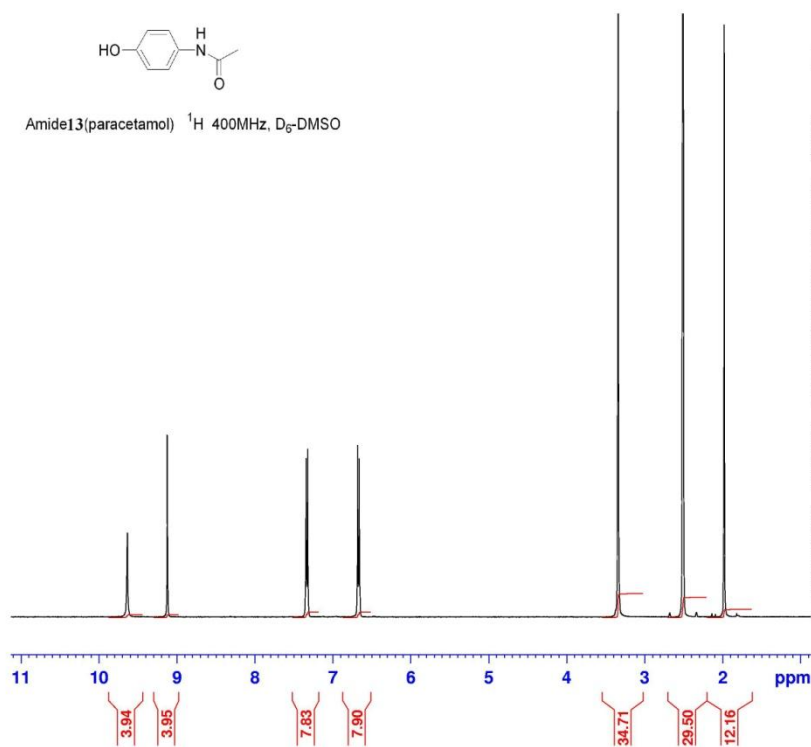

Current Data Parameters  
NAME Jul05-2012-tchabenko  
EXPNO 20  
PROCNO 1

F2 - Acquisition Parameters  
Date\_ 20120706  
Time 3.47  
INSTRUM AVIII\_400  
PROBHD 5 mm PABBO BB-  
PULPROG zg30  
TD 65336  
SOLVENT DMSO  
NS 16  
DS 2  
SWH 8223.685 Hz  
FIDRES 0.125483 Hz  
AQ 3.9846387 sec  
RG 181  
DW 60.800 usec  
DE 17.04 usec  
TE 299.1 K  
D1 1.0000000 sec  
TDO 1

===== CHANNEL f1 =====  
NUC1 1H  
P1 9.20 usec  
PL1 -6.00 dB  
PL1W 32.20000076 W  
SFO1 400.1124708 MHz

F2 - Processing parameters  
SI 32768  
SF 400.1100000 MHz  
WDW EM  
SSB 0  
LB 0.30 Hz  
GB 0  
PC 1.00

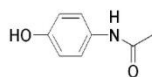

Amide13(paracetamol) <sup>13</sup>C 135MHz, D<sub>6</sub>-DMSO

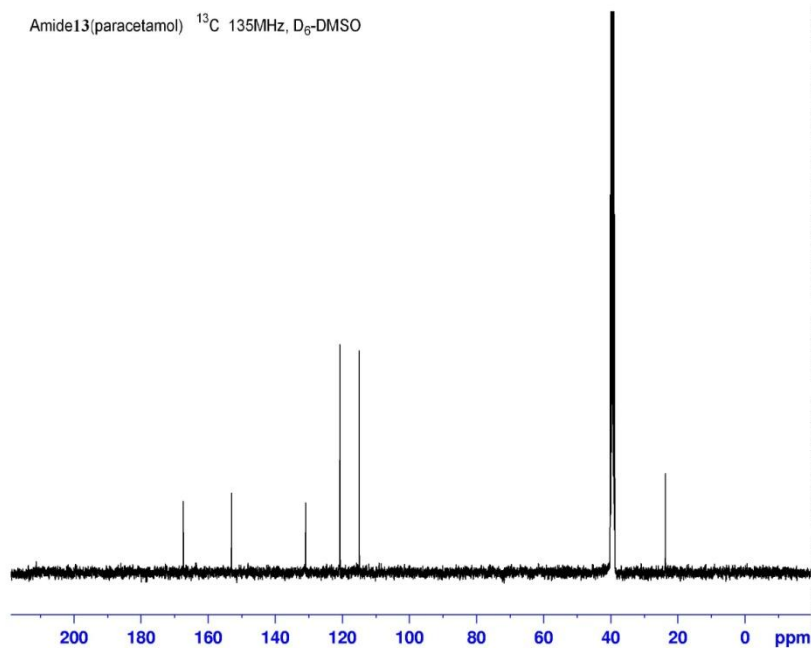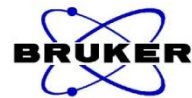

Current Data Parameters  
NAME Jul06-2012-tchabenko  
EXPNO 10  
PROCNO 1

F2 - Acquisition Parameters  
Date\_ 20120706  
Time 11.07  
INSTRUM AVIII\_400  
PROBHD 5 mm PABBO BB-  
PULPROG zgpg30  
TD 96150  
SOLVENT DMSO  
NS 1024  
DS 4  
SWH 24038.461 Hz  
FIDRES 0.250010 Hz  
AQ 1.9999700 sec  
RG 1820  
DW 20.800 usec  
DE 6.50 usec  
TE 299.2 K  
D1 1.0000000 sec  
D11 0.0300000 sec  
TDO 1

===== CHANNEL f1 =====  
NUC1 13C  
P1 8.00 usec  
PL1 -4.30 dB  
PL1W 96.67987061 W  
SFO1 100.6178003 MHz

===== CHANNEL f2 =====  
CPDPRG2 waltz64  
NUC2 1H  
PCPD2 60.00 usec  
PL2 -6.00 dB  
PL12 10.29 dB  
PL13 13.29 dB  
PL2W 32.20000076 W  
PL12W 0.75658178 W  
PL13W 0.37918913 W  
SFO2 400.1116004 MHz

F2 - Processing parameters  
SI 131072  
SF 100.6077903 MHz  
WDW EM  
SSB 0  
LB 2.00 Hz  
GB 0  
PC 1.40

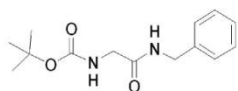

Amide 14, <sup>1</sup>H 400 MHz, CDCl<sub>3</sub>

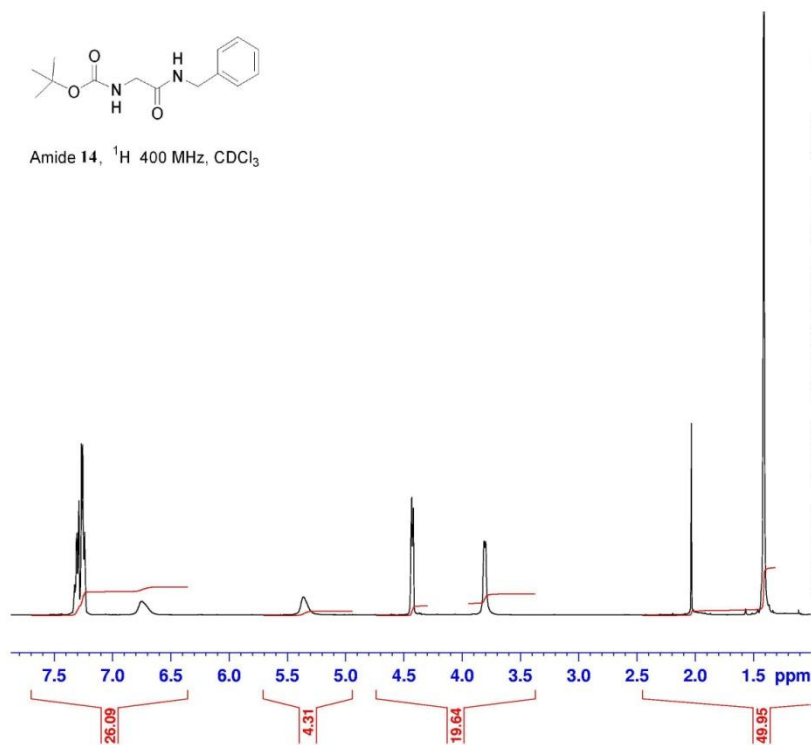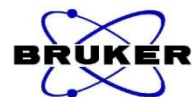

Current Data Parameters  
 NAME Jun18-2012-tchabenko  
 EXPNO 10  
 PROCNO 1

F2 - Acquisition Parameters  
 Date\_ 20120618  
 Time 14.01  
 INSTRUM AVIII\_400  
 PROBHD 5 mm PABBO BB-  
 PULPROG zg30  
 TD 65336  
 SOLVENT CDCl3  
 NS 16  
 DS 2  
 SWH 8223.685 Hz  
 FIDRES 0.125483 Hz  
 AQ 3.9846387 sec  
 RG 57  
 DW 60.800 usec  
 DE 17.04 usec  
 TE 299.1 K  
 D1 1.0000000 sec  
 TDO 1

===== CHANNEL f1 =====  
 NUC1 1H  
 P1 9.20 usec  
 PL1 -6.00 dB  
 PL1W 32.2000076 W  
 SFO1 400.1124708 MHz

F2 - Processing parameters  
 SI 32768  
 SF 400.1100070 MHz  
 WDW EM  
 SSB 0  
 LB 0.30 Hz  
 GB 0  
 PC 1.00

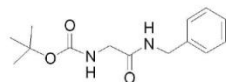

Amide 14, <sup>13</sup>C 135 MHz, CDCl<sub>3</sub>  
 room temperature 1024 scan experiment

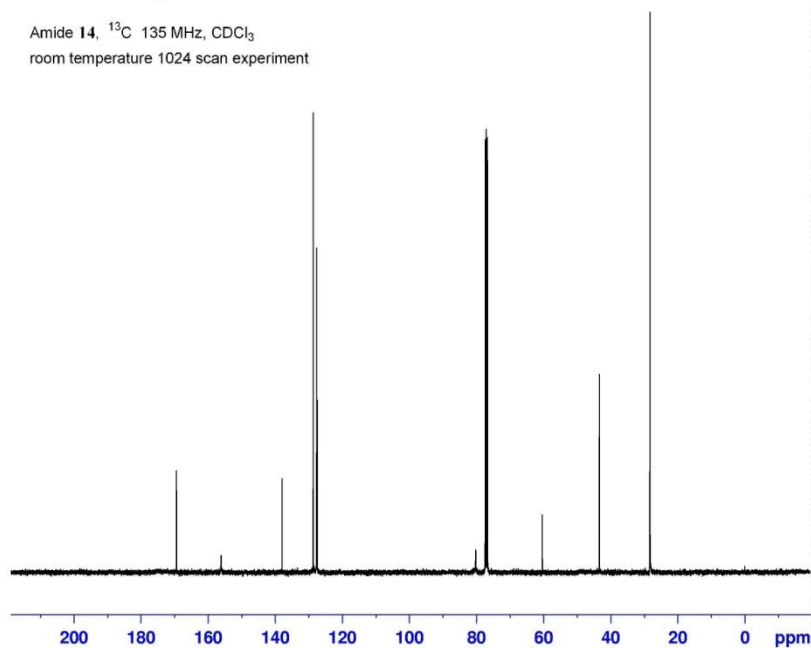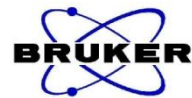

Current Data Parameters  
 NAME Jun18-2012-tchabenko  
 EXPNO 11  
 PROCNO 1

F2 - Acquisition Parameters  
 Date\_ 20120618  
 Time 14.55  
 INSTRUM AVIII\_400  
 PROBHD 5 mm PABBO BB-  
 PULPROG zgpg30  
 TD 96150  
 SOLVENT CDCl3  
 NS 1024  
 DS 4  
 SWH 24038.461 Hz  
 FIDRES 0.250010 Hz  
 AQ 1.9999700 sec  
 RG 2050  
 DW 20.800 usec  
 DE 6.50 usec  
 TE 299.9 K  
 D1 1.0000000 sec  
 D11 0.03000000 sec  
 TDO 1

===== CHANNEL f1 =====  
 NUC1 13C  
 P1 8.00 usec  
 PL1 -4.30 dB  
 PL1W 96.67987061 W  
 SFO1 100.6178003 MHz

===== CHANNEL f2 =====  
 CPDPRG2 waltz64  
 NUC2 1H  
 FPCPD2 60.00 usec  
 PL2 -6.00 dB  
 PL12 10.29 dB  
 PL13 13.29 dB  
 PL2W 32.20000076 W  
 PL12W 0.75658178 W  
 PL13W 0.37918913 W  
 SFO2 400.1116004 MHz

F2 - Processing parameters  
 SI 131072  
 SF 100.6077400 MHz  
 WDW EM  
 SSB 0  
 LB 1.00 Hz  
 GB 0  
 PC 1.40



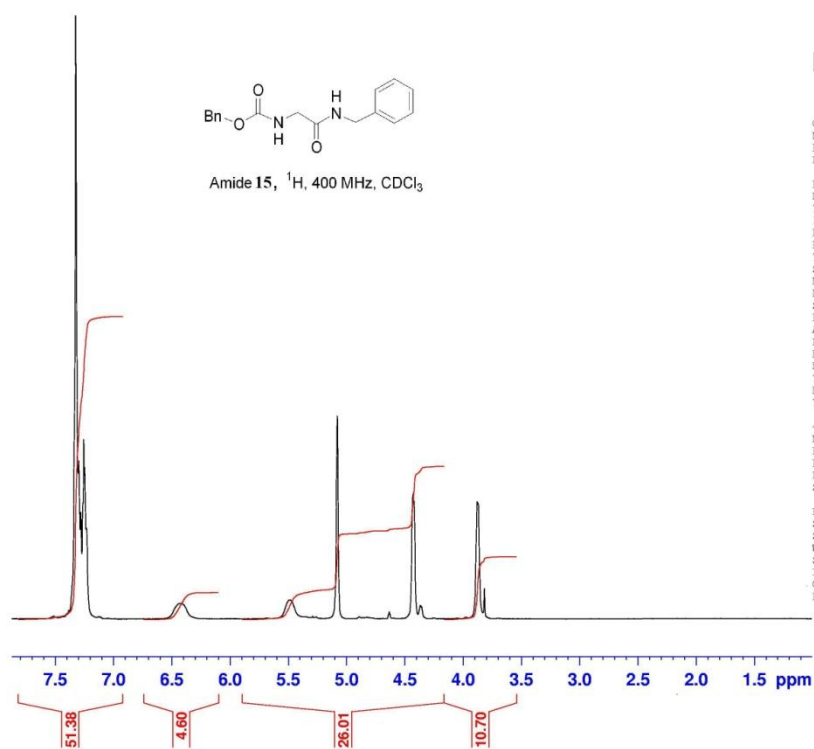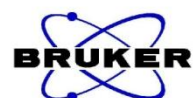

Current Data Parameters  
 NAME Jul26-2012-tchabenko  
 EXPNO 10  
 PROCNO 1

F2 - Acquisition Parameters  
 Date\_ 20120727  
 Time 0.37  
 INSTRUM AVIII\_400  
 PROBHD 5 mm PABBO BB-  
 PULPROG zg30  
 TD 65336  
 SOLVENT CDCl3  
 NS 16  
 DS 2  
 SWH 8223.685 Hz  
 FIDRES 0.125483 Hz  
 AQ 3.9846387 sec  
 RG 128  
 DW 60.800 usec  
 DE 16.66 usec  
 TE 298.6 K  
 D1 1.0000000 sec  
 TDO 1

===== CHANNEL f1 =====  
 NUC1 1H  
 P1 11.00 usec  
 PL1 -6.00 dB  
 PL1W 32.20000076 W  
 SFO1 400.1124708 MHz

F2 - Processing parameters  
 SI 32768  
 SF 400.1100122 MHz  
 WDW EM  
 SSB 0  
 LB 0.30 Hz  
 GB 0  
 PC 1.00

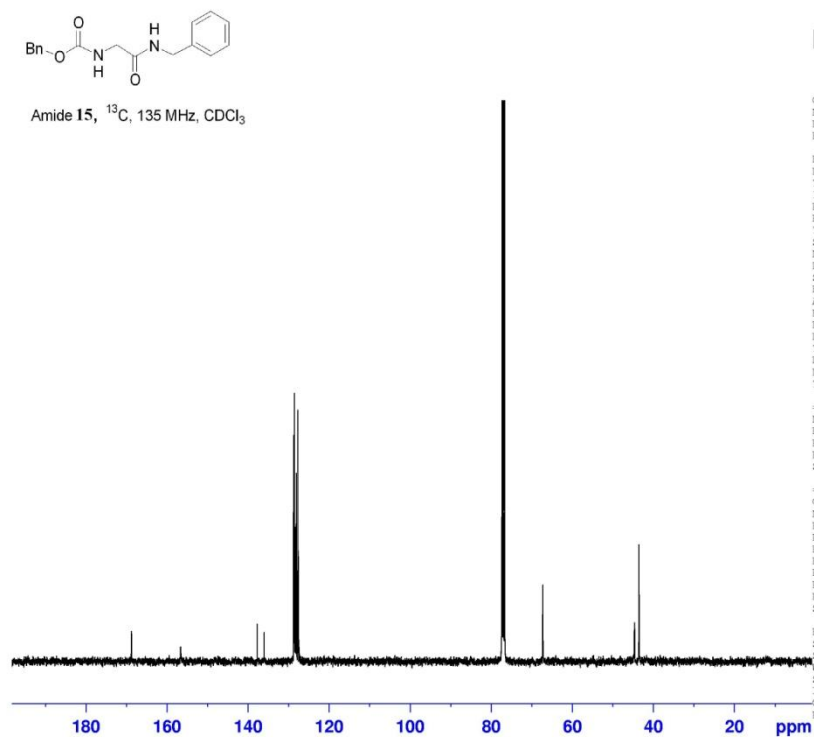

Current Data Parameters  
 NAME Jul26-2012-tchabenko  
 EXPNO 11  
 PROCNO 1

F2 - Acquisition Parameters  
 Date\_ 20120727  
 Time 1.30  
 INSTRUM AVIII\_400  
 PROBHD 5 mm PABBO BB-  
 PULPROG zgpg30  
 TD 96150  
 SOLVENT CDCl3  
 NS 1024  
 DS 4  
 SWH 24038.461 Hz  
 FIDRES 0.250010 Hz  
 AQ 1.9999700 sec  
 RG 1290  
 DW 20.800 usec  
 DE 6.50 usec  
 TE 300.2 K  
 D1 1.0000000 sec  
 D11 0.03000000 sec  
 TDO 1

===== CHANNEL f1 =====  
 NUC1 13C  
 P1 9.00 usec  
 PL1 -4.30 dB  
 PL1W 96.67987061 W  
 SFO1 100.6178003 MHz

===== CHANNEL f2 =====  
 CPDPRG2 waltz64  
 NUC2 1H  
 FPCPD2 60.00 usec  
 PL2 -6.00 dB  
 PL12 8.74 dB  
 PL13 13.29 dB  
 PL2W 32.20000076 W  
 PL12W 1.08107519 W  
 PL13W 0.37918913 W  
 SFO2 400.1116004 MHz

F2 - Processing parameters  
 SI 131072  
 SF 100.6077400 MHz  
 WDW EM  
 SSB 0  
 LB 2.00 Hz  
 GB 0  
 PC 1.40

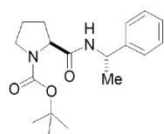

Amide 16,  $^1\text{H}$ , 500 MHz,  $\text{D}_6\text{-DMSO}$ ,  $90^\circ\text{C}$

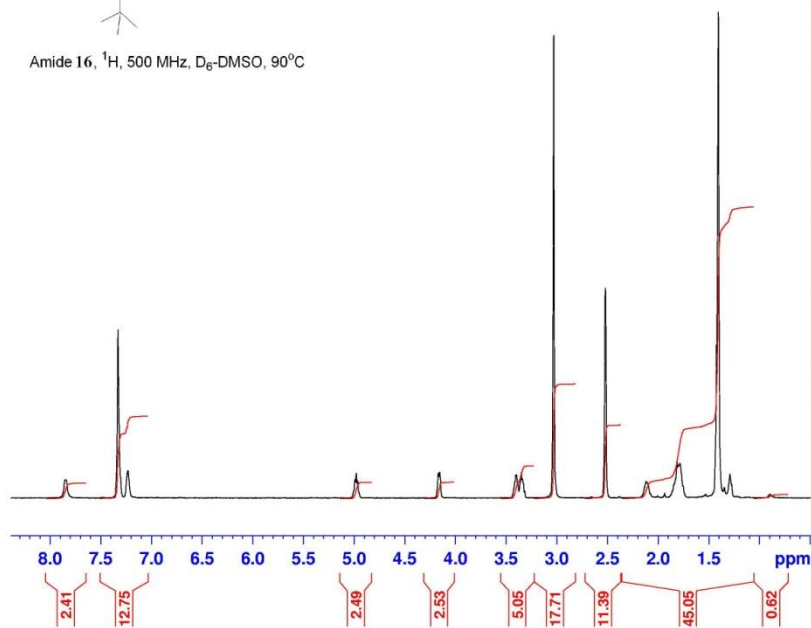

Current Data Parameters  
NAME KT251  
EXPNO 10  
PROCNO 1

F2 - Acquisition Parameters  
Date\_ 20120704  
Time 14.25  
INSTRUM spect  
PROBHD 5 mm Multinucl  
PULPROG zg30  
TD 65536  
SOLVENT DMSO  
NS 32  
DS 0  
SWH 7507.507 Hz  
FIDRES 0.114555 Hz  
AQ 4.3647475 sec  
RG 322.5  
DW 66.600 usec  
DE 7.11 usec  
TE 363.0 K  
D1 4.0000000 sec  
MCREST 0.0000000 sec  
MCWRK 0.0150000 sec

===== CHANNEL f1 =====  
NUC1 1H  
P1 6.00 usec  
PL1 -3.00 dB  
SFO1 500.1325007 MHz

F2 - Processing parameters  
SI 32768  
SF 500.1299947 MHz  
WDW EM  
SSB 0  
LB 0.10 Hz  
GB 0  
PC 1.00

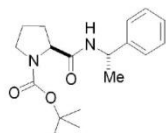

Amide 16,  $^{13}\text{C}$ , 135 MHz,  $\text{D}_6\text{-DMSO}$   
room temperature, 1024 scans

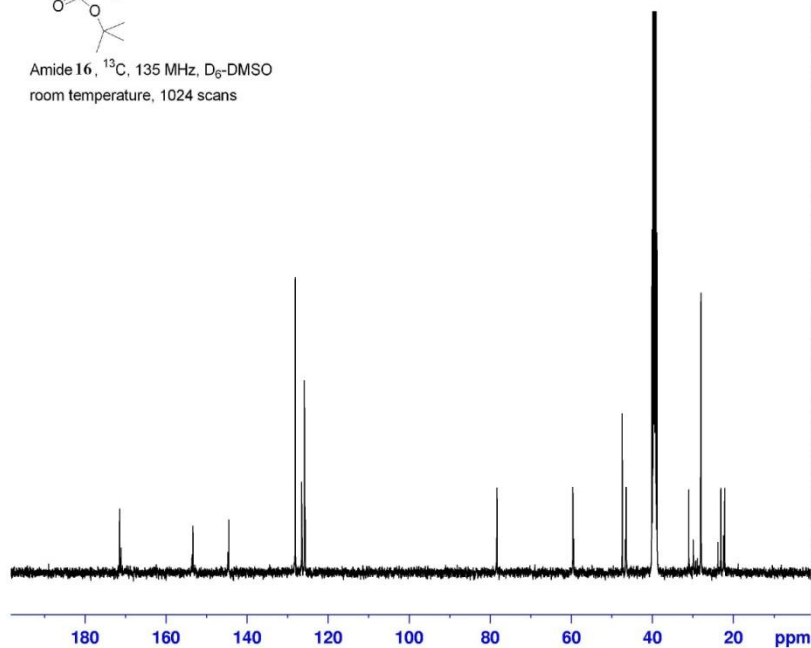

Current Data Parameters  
NAME Jul05-2012-tchabenko  
EXPNO 10  
PROCNO 1

F2 - Acquisition Parameters  
Date\_ 20120705  
Time 11.32  
INSTRUM AVIII\_400  
PROBHD 5 mm PABBO BB-  
PULPROG zgpg30  
TD 96150  
SOLVENT DMSO  
NS 1024  
DS 4  
SWH 24038.461 Hz  
FIDRES 0.250010 Hz  
AQ 1.9999700 sec  
RG 1620  
DW 20.800 usec  
DE 6.50 usec  
TE 299.8 K  
D1 1.0000000 sec  
D11 0.0300000 sec  
TD0 1

===== CHANNEL f1 =====  
NUC1 13C  
P1 8.00 usec  
PL1 -4.30 dB  
PL1W 96.67987061 W  
SFO1 100.6178003 MHz

===== CHANNEL f2 =====  
CPDPRG2 waltz64  
NUC2 1H  
PCPD2 60.00 usec  
PL2 -6.00 dB  
PL12 10.29 dB  
PL13 13.29 dB  
PL2W 32.20000076 W  
PL12W 0.75658178 W  
PL13W 0.37918913 W  
SFO2 400.1116004 MHz

F2 - Processing parameters  
SI 131072  
SF 100.6077903 MHz  
WDW EM  
SSB 0  
LB 2.00 Hz  
GB 0  
PC 1.40

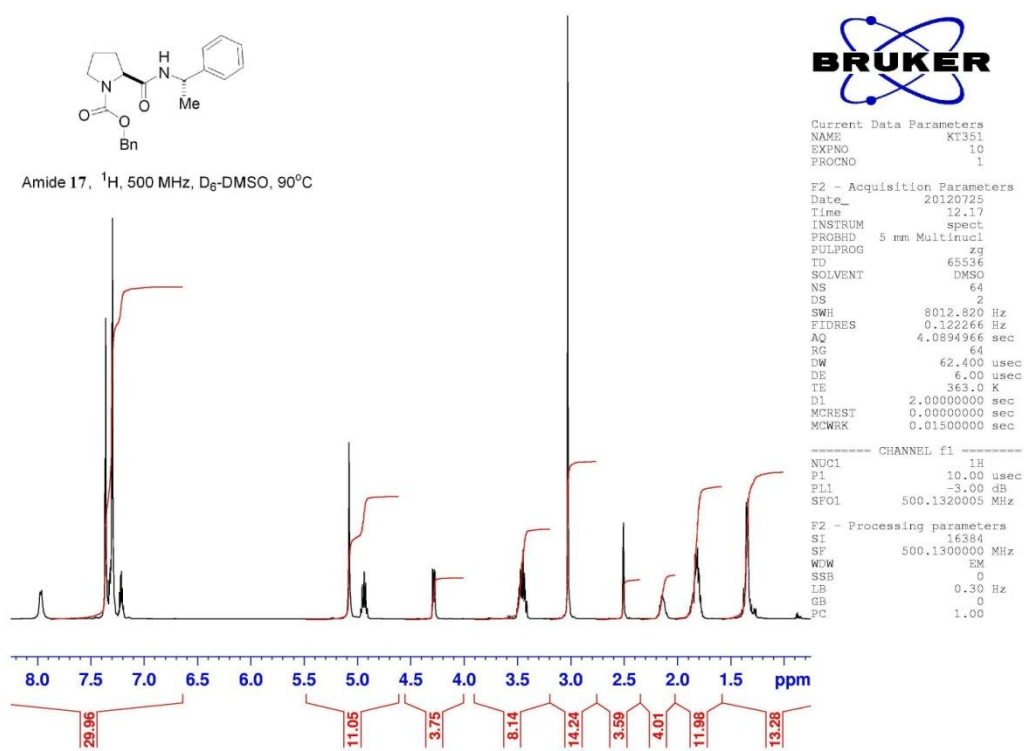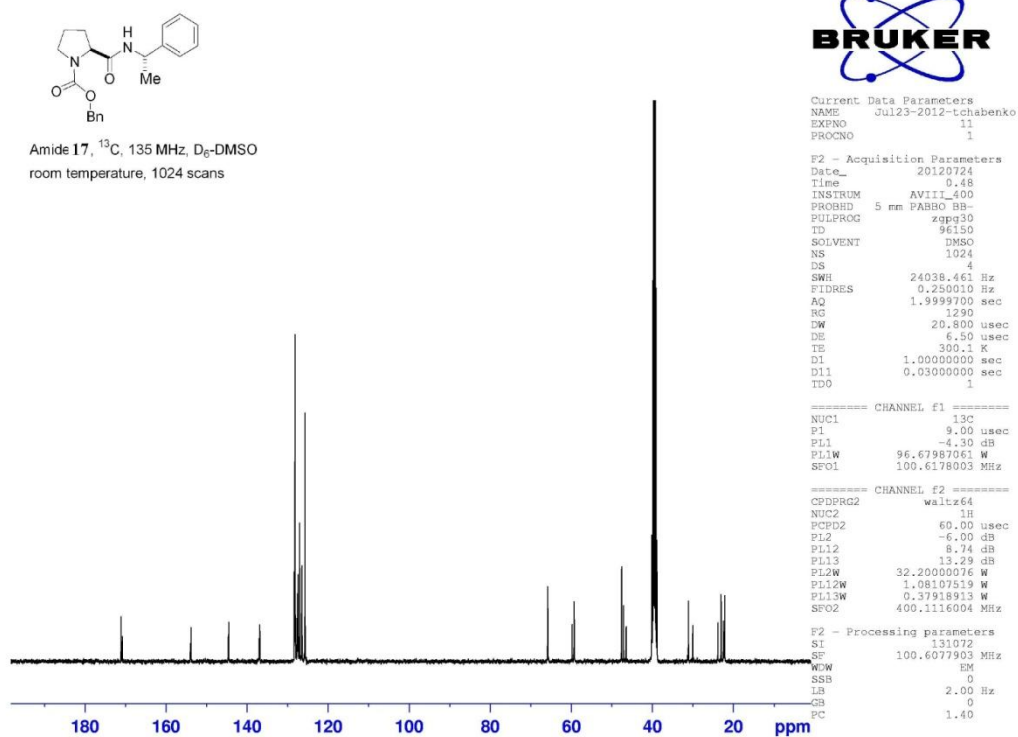

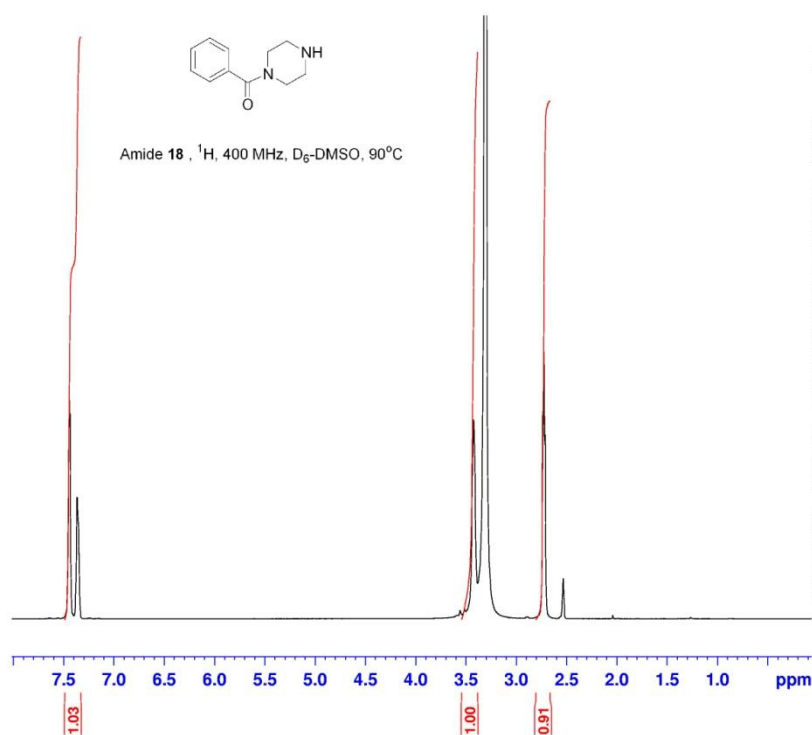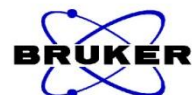

Current Data Parameters  
NAME Sep11-2012-tchabenko  
EXPNO 10  
PROCNO 1

F2 - Acquisition Parameters  
Date\_ 20120911  
Time 9.05  
INSTRUM AVIII\_400  
PROBHD 5 mm PABBO BB-  
PULPROG zg30  
TD 65336  
SOLVENT CDCl3  
NS 16  
DS 2  
SWH 8223.685 Hz  
FIDRES 0.125483 Hz  
AQ 3.9846387 sec  
RG 18  
DW 60.800 usec  
DE 16.66 usec  
TE 363.7 K  
D1 1.0000000 sec  
TDO 1

===== CHANNEL f1 =====  
NUC1  $^1\text{H}$   
P1 11.00 usec  
PL1 -6.00 dB  
PL1W 32.20000076 W  
SFO1 400.1124708 MHz

F2 - Processing parameters  
SI 32768  
SF 400.1118906 MHz  
WDW EM  
SSB 0  
LB 0.30 Hz  
GB 0  
PC 1.00

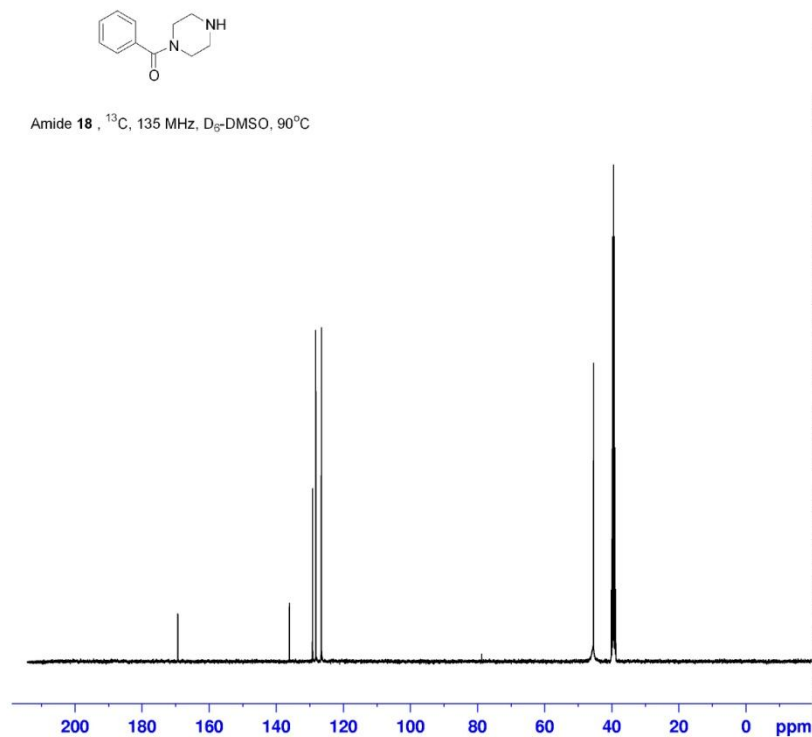

Current Data Parameters  
NAME Sep11-2012-tchabenko  
EXPNO 11  
PROCNO 1

F2 - Acquisition Parameters  
Date\_ 20120911  
Time 9.59  
INSTRUM AVIII\_400  
PROBHD 5 mm PABBO BB-  
PULPROG zgpg30  
TD 96150  
SOLVENT CDCl3  
NS 1024  
DS 4  
SWH 24038.461 Hz  
FIDRES 0.250010 Hz  
AQ 1.9999700 sec  
RG 2050  
DW 20.800 usec  
DE 6.50 usec  
TE 363.2 K  
D1 1.0000000 sec  
D11 0.0300000 sec  
TDO 1

===== CHANNEL f1 =====  
NUC1  $^{13}\text{C}$   
P1 9.00 usec  
PL1 -4.30 dB  
PL1W 96.67987061 W  
SFO1 100.6178003 MHz

===== CHANNEL f2 =====  
CPDPRG2 waltz64  
NUC2  $^1\text{H}$   
PCPD2 60.00 usec  
PL2 -6.00 dB  
PL12 8.74 dB  
PL13 13.29 dB  
PL2W 32.20000076 W  
PL12W 1.08107519 W  
PL13W 0.37918913 W  
SFO2 400.1116004 MHz

F2 - Processing parameters  
SI 131072  
SF 100.6082722 MHz  
WDW SW  
SSB 0  
LB 2.00 Hz  
GB 0  
PC 1.40

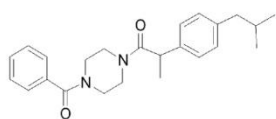

Amide 19, <sup>1</sup>H, 400 MHz, D<sub>6</sub>-DMSO, 90°C

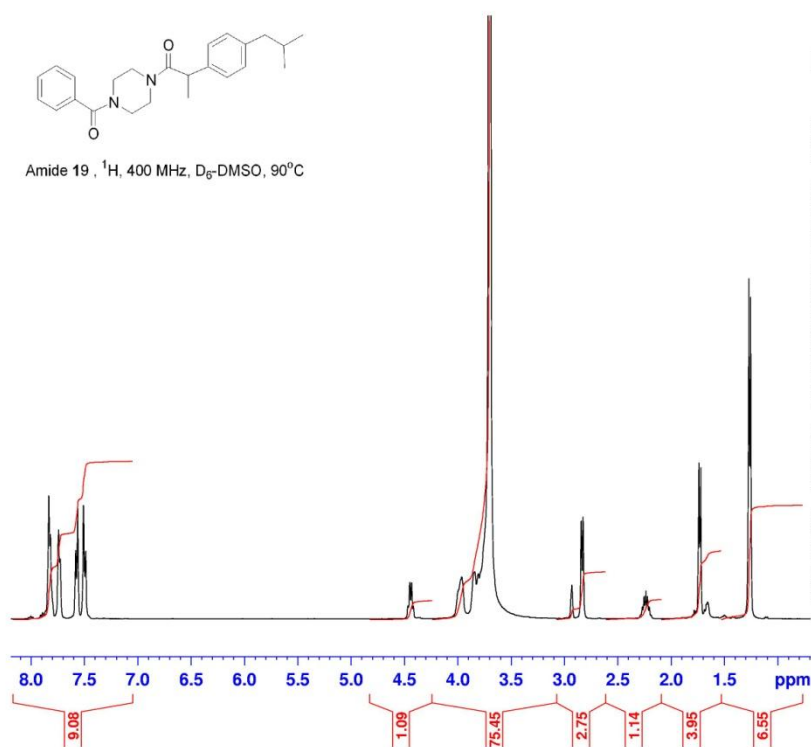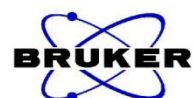

Current Data Parameters  
 NAME Sep12-2012-tchabenko  
 EXPNO 20  
 PROCNO 1

F2 - Acquisition Parameters  
 Date\_ 20120912  
 Time 14.54  
 INSTRUM AVIII\_400  
 PROBHD 5 mm PABBO BB-  
 PULPROG zg30  
 ID 65336  
 SOLVENT DMF  
 NS 16  
 DS 2  
 SWH 8223.685 Hz  
 FIDRES 0.125483 Hz  
 AQ 3.9846387 sec  
 RG 18  
 DW 60.800 usec  
 DE 16.66 usec  
 TE 363.2 K  
 D1 1.0000000 sec  
 TDO 1

===== CHANNEL f1 =====  
 NUC1 1H  
 P1 11.00 usec  
 PL1 -6.00 dB  
 PL1W 32.20000076 W  
 SFO1 400.1124708 MHz

F2 - Processing parameters  
 SI 32768  
 SF 400.1100000 MHz  
 WDW EM  
 SSB 0  
 LB 0.30 Hz  
 GB 0  
 PC 1.00

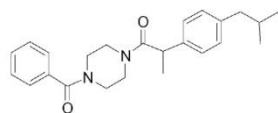

Amide 19, <sup>13</sup>C, 135 MHz, D<sub>6</sub>-DMSO, 90°C

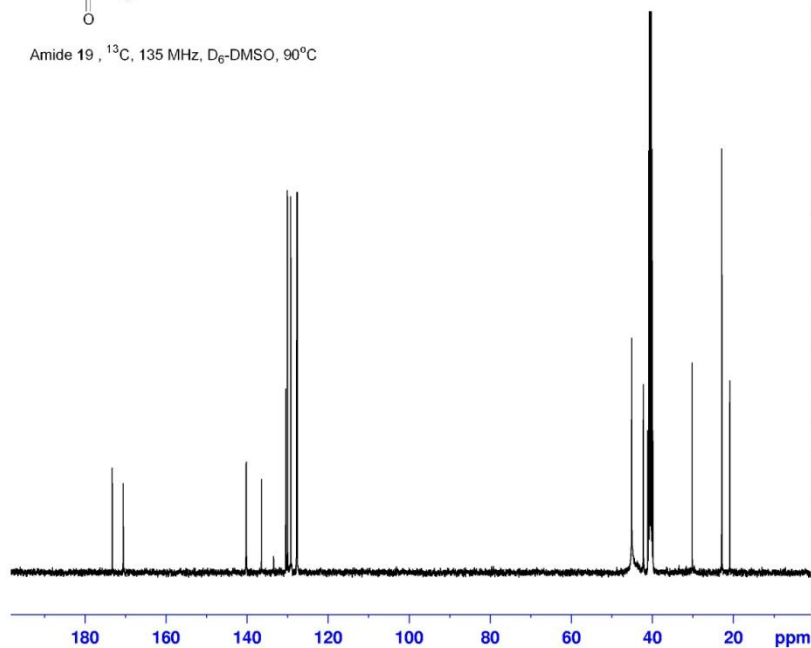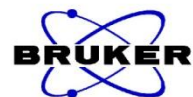

Current Data Parameters  
 NAME Sep12-2012-tchabenko  
 EXPNO 21  
 PROCNO 1

F2 - Acquisition Parameters  
 Date\_ 20120912  
 Time 15.48  
 INSTRUM AVIII\_400  
 PROBHD 5 mm PABBO BB-  
 PULPROG zgpg30  
 ID 96150  
 SOLVENT DMF  
 NS 1024  
 DS 4  
 SWH 24038.461 Hz  
 FIDRES 0.250010 Hz  
 AQ 1.9999700 sec  
 RG 2050  
 DW 20.800 usec  
 DE 6.50 usec  
 TE 363.2 K  
 D1 1.0000000 sec  
 D11 0.03000000 sec  
 TDO 1

===== CHANNEL f1 =====  
 NUC1 13C  
 P1 9.00 usec  
 PL1 -4.30 dB  
 PL1W 96.67987061 W  
 SFO1 100.6178003 MHz

===== CHANNEL f2 =====  
 CPDPRG2 waltz64  
 NUC2 1H  
 PCPD2 60.00 usec  
 PL2 -6.00 dB  
 PL12 8.74 dB  
 PL13 13.29 dB  
 PL2W 32.20000076 W  
 PL12W 1.08107519 W  
 PL13W 0.37918913 W  
 SFO2 400.1116004 MHz

F2 - Processing parameters  
 SI 131072  
 SF 100.6077400 MHz  
 WDW EM  
 SSB 0  
 LB 2.00 Hz  
 GB 0  
 PC 1.40
